# Supplementary material
Source: PubMed Central journal article supplement (PMC6475378)
Supplement: pnas.1806541116.sapp.pdf [file pnas.1806541116.sapp.pdf]

Supplementary Information for

**Histone 2B monoubiquitination complex integrates transcript elongation with splicing at circadian clock and flowering time regulators**

**Magdalena Woloszynska, Sabine Le Gall, Pia Neyt, Tommaso M. Boccardi, Marion Grasser, Gernot Längst, Stijn Aesaert, Griet Coussens, Stijn Dhondt, Eveline Van De Slijke, Leonardo Bruno, Jorge Fung-Uceda, Paloma Mas, Marc Van Montagu, Dirk Inzé, Kristiina Himanen, Geert De Jaeger, Klaus D. Grasser, and Mieke Van Lijsebettens**

Corresponding author: Mieke Van Lijsebettens  
Email: mieke.vanlijsebettens@psb.ugent.be

**This PDF file includes:**

Supplementary text  
Figs. S1 to S6  
Tables S1 to S3  
SI References

**Other supplementary materials for this manuscript include the following:**

Dataset S1

## MATERIALS AND METHODS

**Plant material and growth conditions.** *hub1-4* (SALK\_122512), *spen3-1* (SALK\_025388) (1), *spen3-3* (GABI\_626H01) (2), *khd1-1* (SALK\_046957) (1), *hub1-3* (GABI\_276D08) (2), *hub1-4* (SALK\_122512) (1), *hub2-1* (GABI\_634H04) (2), *khd1-3* (SAIL\_1285\_H03C1) (3) in Col-0 background were obtained from the Nottingham *Arabidopsis* Stock Centre. T-DNA insertions were confirmed by PCR. A second T-DNA in *spen3-3* (GABI\_626H01) was located at the 3' UTR of the *At1g77920* and the 5' end of the *At1g77930* genes, but did not affect their respective gene expression levels (Fig. S4). The *hub1-3 hub2-1* mutant had been described previously (4), whereas the *spen3-1 hub1-4* and *khd1-1 hub1-4* double mutants were constructed in this work and the genotypes were verified by PCR. The clock reporter lines expressing *pCCA1::LUC* (5) and *pTOC1::LUC* (6) were crossed into the *hub1-4*, *spen3-1*, and *khd1-1* mutants and homozygous lines analyzed by *in vivo* luminescence assays. The *p35S::GFP::SPEN3* and *p35S::GFP::KHD1* constructs were obtained by Gateway recombination and were transformed into *Agrobacterium tumefaciens* cells that were used for tobacco (*Nicotiana benthamiana*) leaf infiltration and stable transformation into *Arabidopsis thaliana* (L.) Heynh., accession Columbia-0 (Col-0) by floral dip.

Seedlings were grown in soil (jiffy containers) under growth chamber conditions, namely 16 h day/8 h night with white light and 21°C for flowering time experiments. Seeds for *in vitro* time-lapse analysis on the IGIS platform (7) were sterilized in 3% (v/v) bleach for 15 min and sown on medium containing half-strength Murashige and Skoog (MS) medium (Duchefa), solidified with 0.9% (w/v) plant tissue culture agar (Lab M) on round Petri dishes, stratified for 2 days, then incubated in a growth chamber under long-day conditions (16 h light, 8 h darkness) at 21°C. The average light intensity supplied by cool-white fluorescent tubes (Spectralux Plus 36W/840; Radium) was approximately  $60 \mu\text{mol m}^{-2} \text{s}^{-1}$  for *in vitro* and in soil-grown experiments. For bioluminescence assays, plants were stratified for 3 days at 4°C on plates with MS agar medium and grown for 7 days under 12 h light, 12 h dark cycles with  $60 \mu\text{mol m}^{-2} \text{s}^{-1}$  white light at a constant 22°C temperature. Seedlings were transferred to 96-well plates containing MS agar and 3 mM luciferine (Promega). Luminescence rhythms were monitored under constant white light conditions ( $60 \mu\text{mol m}^{-2} \text{s}^{-1}$ ) with a luminometer LB-960 (Berthold Technologies) and analyzed with the software MikroWin 2000, version 4.34 (Mikrotek Laborsysteme).

Growth parameters and flowering time were also measured by means of an automated weighing, imaging, and watering phenotyping platform, acronym WIWAM XY ([www.wiwam.be](http://www.wiwam.be)) according to established protocols (8, 9). WIWAM was placed in an *Arabidopsis* growth room at 21°C, 55% relative humidity, 16 h day/8 h night, and  $100 \mu\text{mol m}^{-2} \text{s}^{-1}$  light intensity. Seeds were stratified 2 days before sowing in pots with 80-90 g of soil that were randomized by the WIWAM platform. During the entire experiment, the soil water content was set at a constant value of 2.19 g H<sub>2</sub>O/g dry soil. Images were acquired for each pot on a daily basis and analyzed. The data were validated with the in-house Interface for Plant Phenotype Analysis (PIPPA) (10).

**Circadian clock period calculation.** The circadian periods were calculated with the Fast Fourier Transform–Non-Linear Least-squares (FFT-NLLS) suite of the BioDare online data repository (<https://biodare2.ed.ac.uk/documents/period-methods>) (11). This suite is commonly accepted and

widely used in the circadian community and the method is clearly described on the web page. Essentially, the period estimation is based on curve fitting. FFT NLLS starts with a model with a single cosine and determines the parameters ( $\tau_1$ ,  $\phi_1$ ,  $\alpha_1$ , and  $c$ ) by means of a non-linear least squares fitting algorithm. This procedure is repeated with models with additional cosine components (increased  $N$ ), until addition of a supplemental cosine term does not improve significantly the resulting fit. Once the best model and its parameters have been found, the period is taken to be the period of the cosine component lying within a user-defined range of likely circadian periods (typically 15-35 h).

**Bioinformatic analysis.** With the PLAZA 2.5 bioinformatic tool, common down- or upregulated genes were classified into significantly overrepresented ( $P < 0.05$ ) gene ontology (GO) classes of the Biological Process type (12).

**Multiprobe *in situ* hybridization.** Short and specific (GSTs) fragments of the *HUB1* (At2g44950), *SPEN3*(At1g27750), and *KHD1* (At1g51580) genes were cloned in the pGEM-T-Easy vector (Promega). Labeled RNA probes were synthesized by means of *in vitro* transcription in the presence of digoxigenin-11-UTP (*SPEN3* probe), biotin-16-UTP (*KHD1* probe), fluorescein-12-UTP (*HUB1* probe) and processed as reported (13). Four-day-old *Arabidopsis* Col-0 seedlings were fixed, dehydrated, and handled as described (13). *In situ* hybridization was done with a mix of riboprobes and hybridized by *in situ* whole-mount methodology (13) with minor modifications, namely the hybridization step was carried out overnight at 55°C and the mixture of primary and secondary antibodies was diluted 1:500. Samples were imaged with a Leica inverted TCS SP8 confocal scanning laser microscope. The Alexa fluor dyes were detected simultaneously by combining the settings indicated in the sequential scanning facility of the microscope.

**Root growth analysis.** Root growth was measured on seedlings grown vertically on half-strength MS medium supplemented with 1% (w/v) sucrose, 0.8% (w/v) plant tissue culture agar (Lab M), pH 5.7, at 21°C under 24-h light conditions ( $75 \mu\text{mol m}^{-2} \text{s}^{-1}$ ). The root meristem size was determined 5 days after germination (DAG) as the number of cells in the cortex cell file from the quiescent center to the first elongated cell (14). The samples were mounted with clearing solution (80 g chloral hydrate, 30 ml glycerol, and 10 ml dH<sub>2</sub>O) and observed immediately. Root length was marked at 10 DAG and measured with the ImageJ software (<http://rsbweb.nih.gov/ij/>). Means between samples were compared by a two-tailed Student's *t*-test and variances with an ANOVA.

**Tandem Affinity Purification.** TAP (15) or GS (16) tags were fused N-terminally to full length cDNAs of HUB1, HUB1pm, and HUB2, and C-terminally to SPEN3. In the HUB1pm, two cysteines of the RING domain (positions 826 and 829) were replaced by serines. The TAP-tagged HUB1 proteins were enzymatically active and complemented partially the *hub1-1* mutation (4). Tagged transgenes were expressed under the control of the constitutive cauliflower tobacco mosaic virus 35S promoter and transformed in *Arabidopsis* cell suspension cultures (17). Protocols of proteolysis and peptide isolation, acquisition of mass spectra by a 4800 Proteomics Analyzer (Applied Biosystems), and mass spectrometry-based protein homology identification based on the TAIR genomic database, were as described (18). Experimental background proteins

were subtracted based on approximately 40 TAP experiments on wild-type cultures and cultures expressing the TAP-tagged mock proteins GUS, RFP, and GFP (18).

**Production of recombinant proteins.** The RRM domain-containing region of SPEN3 and the two KH domain-containing region of KHD1 were amplified by PCR with *HiFi* DNA polymerase (KAPA Biosystems) and the iProof high-fidelity PCR kit (Bio-Rad), respectively, with an *Arabidopsis* cDNA library as template and primers providing the required restriction enzyme cleavage sites (Table S3). The amplified PCR fragment of SPEN3 was digested with *Bam*HI/*Sa*II and cloned into the *Bam*HI/*Sa*II-digested *E. coli* expression plasmid pGEX-5X-1 (GE Healthcare), providing an N-terminal GST with the pGEX-5X-1-RRM-SPEN3 plasmid for the RRM domain of SPEN3 as a result. The obtained PCR fragment of KHD1 was digested with *Bam*HI/*Sa*II and cloned into the *Bam*HI/*Sa*II-digested *E. coli* expression plasmid pQE9 (Qiagen), providing an N-terminal 6×His-tag, resulting in the pQE9-KHD1-N plasmid for the N-end part of KHD1 that contains two KH domains. Plasmid constructions were checked by DNA sequencing. For protein production, the pGEX-5X-1-RRM-SPEN3 expression vector was transformed into *E. coli* BL21+pRARE cells. After induction by 1 mM isopropyl β-D-1-thiogalactopyranoside (IPTG; Sigma-Aldrich), the GST-tagged RRM-SPEN3 was purified by glutathione-sepharose affinity chromatography as previously described (19). *E. coli* M15 cells were transformed with the pQE9-KHD1-N expression vector. After induction by 1 mM IPTG, the 6×His-tagged KHD1-N was purified by metal-chelate chromatography with Ni-NTA agarose (Qiagen) from *E. coli* lysates essentially as described previously (20). By means of PD10 columns (Pharmacia), the purified proteins were collected in buffer (10 mM phosphate buffer, pH 7.0, 1 mM EDTA, 1 mM dithiothreitol [DTT], and 0.5 mM phenylmethanesulfonyl fluoride [PMSF; Sigma-Aldrich]) and the recombinant proteins were analyzed by sodium dodecyl sulfate-polyacrylamide gel electrophoresis (SDS-PAGE) and mass spectrometry.

**Fluorescent Electrophoretic Mobility Shift Assay (EMSA) binding.** RNA binding of the recombinant proteins was examined by EMSA as described (20) with fluorescently labeled ssRNA oligonucleotides (Table S3) (21) used before to study general RNA interactions of various *Arabidopsis* proteins (20, 21). Different protein concentrations were incubated for 15 min with the Cy3-labeled ssRNA (25 nM) probe in binding buffer (10 mM Hepes, pH 7.9, 3% [w/v] Ficoll, 10 mM MgCl<sub>2</sub>, 5 mM KCl, 200 mM NaCl, 1 mM EDTA, 0.5 mM DTT, 1 mM spermidine, 0.1 mg/ml bovine serum albumin). Binding reactions were analyzed in 1× Tris/borate/EDTA (TBE) polyacrylamide gels. The RNA was visualized by imaging with a Typhoon 8600 instrument (GE Healthcare). Competition assays were done with constant protein concentrations (3 μM) and labeled ssRNA probes and increasing concentrations of unlabeled ssRNA or ssDNA.

**Fluorescent MicroScale Thermophoresis (MST) binding assay.** MST binding experiments were carried out essentially as previously described (20) with 200 nM 25-nucleotide-long Cy3-labeled ssRNA or ssDNA oligonucleotides. MST measurements were done in protein buffers with a protein concentration range at 40% MST power, 50% LED power in standard capillaries at 25°C on a Monolith NT.115 device (NanoTemper Technologies). The data were analyzed with the MO.Affinity Analysis software (V2.3, NanoTemper Technologies) and binding reactions were determined by examining Temperature Related Intensity Changes (TRIC effect). To calculate the fraction bound, the  $\Delta F_{\text{norm}}$  value of each point was divided by the amplitude of the

fitted curve, resulting in values from 0 to 1 (0 = unbound, 1 = bound), and processed with the KaleidaGraph 4.5 (Synergy Software).

**RNA methods.** RNA was isolated with the RNeasy Plant Kit (Qiagen) with on-column DNase digestion. The manufacturer's protocol was modified by two additional washes of RNeasy spin columns with RPE buffer. Complementary DNA (cDNA) was synthesized with the SuperScript III First-strand Synthesis Kit (Life-Invitrogen, CAT. 18080051).

Real-time PCR was run in technical triplicates with the LightCycler 480 SYBR Green I Master (Roche Life Science) and the Janus robot (PerkinElmer) for pipetting. The LightCycler 480 Real-Time PCR System was used for amplification (95°C for 10 min, 45 cycles of 95°C/10 s, 60°C/15 s, 72°C/30 s followed by a melting curve analysis). The qPCR results were analyzed with the qBase Plus software (Biogazelle). The PP2A (At1g13320) and UBC (At5g25760) genes were used as references for gene expression normalization. The primer sequences used are presented in Table S3. For the transcriptome, RNA was extracted from shoot apices of 10-day-old seedlings. The A260/A280 and the A260/A230 ratios were measured with a NanoDrop spectrophotometer (Thermo Fisher Scientific) to evaluate the quantity and purity of the samples. Additionally, the high RNA quality was verified by means of the Agilent Bioanalyzer system. After the library preparation by TruSeq, RNA was sequenced on the Illumina HiSeq. Normalization statistics, and bioinformatics were carried out on the raw data to allow pairwise differential gene expression analyses (Nucleomics Core Facility, VIB, Leuven, Belgium). The Gene Ontology categories of the differentially expressed genes were identified with the PLAZA 2.5 software (12).

**ChIP-qPCR.** The isolated chromatin was sonicated in a Vibra-cell sonicator (Sonics & Materials) with four 15-s pulses at a 20% amplitude and immunoprecipitated with 5 µg of H2Bub antibodies (Medimabs, MM-029). Protein A Agarose (Millipore) was used to collect immunoprecipitated chromatin. After reverse cross-linking and proteinase K digestion, DNA was purified with the MinElute PCR Purification Kit (Qiagen) and eluted with the elution buffer supplemented with RNaseA (10 µg/ml). Samples were analyzed by real-time qPCR with primers in the promoter and coding regions of the *FLC* (22) and *CCA1* (Table S3) genes. The amount of immunoprecipitated DNA was calculated relative to the input.

**Yeast Two-Hybrid Analysis.** Constructs used for Y2H were obtained by cloning cDNAs of the HUB1, HUB2, SPEN3, SPEN3 N-terminus (761 amino acids, including RRM domain), and SPEN3 C-terminus (488 amino acids, including SPOC domain) by the Gateway Technology (Life Technologies). Constructs were introduced by an LR recombination into the pDEST<sup>tm</sup>22 and pDEST<sup>tm</sup>32 destination vectors, resulting in fusions to the GAL4 activation domain (AD) and GAL4-binding domain (BD), respectively (ProQuest<sup>TM</sup> Two-HybridSystem, Life Technologies). All plasmids were transformed into yeast strains with the opposite mating types MaV203 MAT $\alpha$  and MAT $a$ . Transformed yeast strains were selected for the presence of pDEST22 or the pDEST32 vector.

Transformed yeast strains were selected for the presence of pDEST22 or the pDEST32 vector and the abundance of the fusion proteins was assessed by Western-blot. Self-activation of both bait and prey constructs were tested by yeast transformation for non-PREY-specific activation of reporter gene expression by BAIT-constructs or BAIT-GAL-4-DNA-independent activation exerted by PREY constructs in a colony-lift filter assay with X-Gal as substrate. Fusion

proteins that showed self-activation, *i.e.*, HUB2 and KHD1, were omitted from the pairwise screens. Diploid transformants were tested for positive interactions by growing the mating strains in SD-leucine-tryptophan-histidine medium with increasing concentrations (0 mM, 3 mM, and 10 mM) of 3-amino-1,2,4-triazole (3-AT) to assess the interaction strengths. Constructs of known interacting proteins, DmDP and DmE2F, were used as the positive control and the negative control consisted of yeast strains containing an empty AD vector mated with the BD fusion of the protein of interest. For each interaction, three independent biological repeats were done and for the assays the TECAN Genesis Automation and TECAN TEMO-96 pipetting robot were used (TECAN, Munich, Germany).

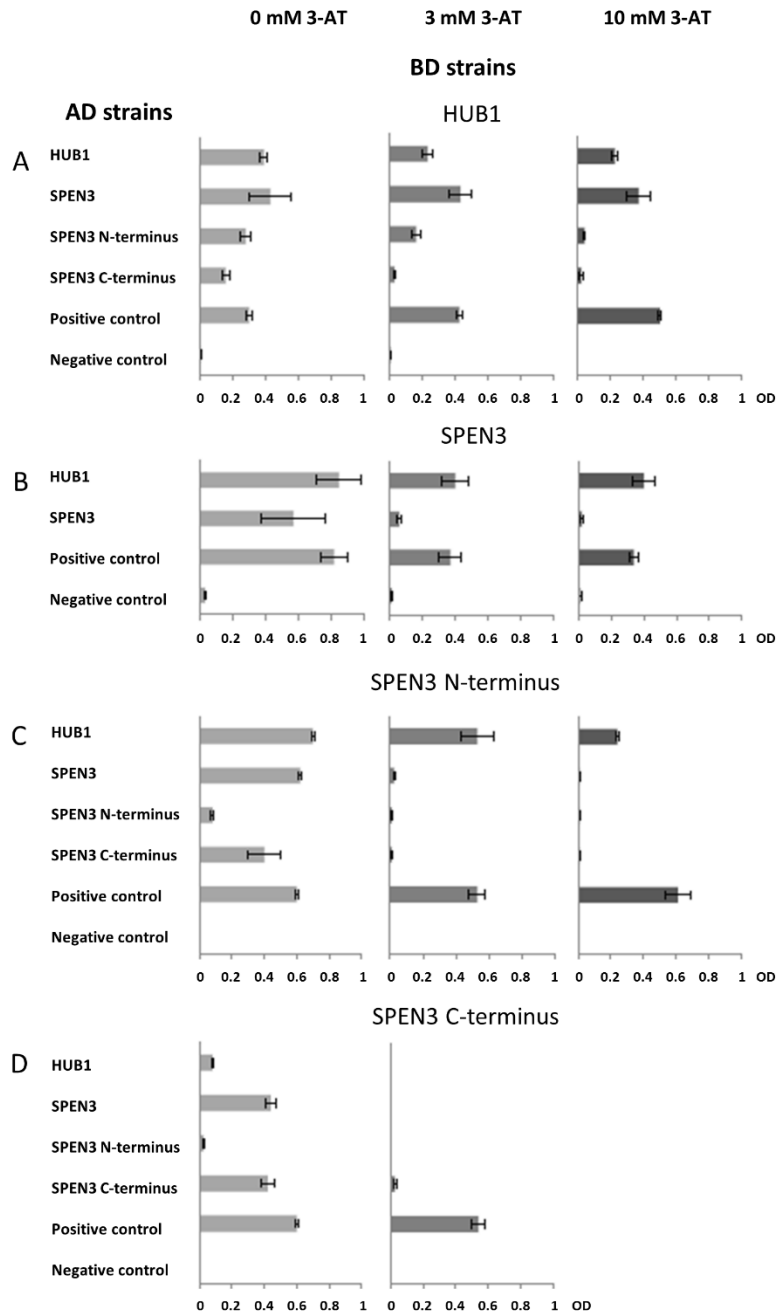

**Fig. S1. Yeast two-hybrid interactions between HUB1, SPEN3, SPEN3 N-terminus, and SPEN3 C-terminus.**

The yeast strains expressing the HUB1, SPEN3, SPEN3 N-terminus, and SPEN3 C-terminus proteins fused to the activation domain (AD strains, ordinate) or binding domain (BD strains, panels A-D) did not show self-activation and were mated pairwise to test for direct interactions between proteins that allowed yeast growth on selective medium and quantification as the optical density ( $OD_{600}$ ) of the culture. Different concentrations (0 mM, 3 mM, and 10 mM) of 3-amino-1,2,4-triazole (3-AT) were applied to the medium to detect the high-affinity binding between two interactors allowing yeast to survive increased 3-AT concentrations. For each interaction, the average of three independent biological repeats are shown. As a positive control, known interactors (DmDP and DmE2F) were used and, as negative control, the empty AD vector strain was mated with the BD fusion of the protein of interest.

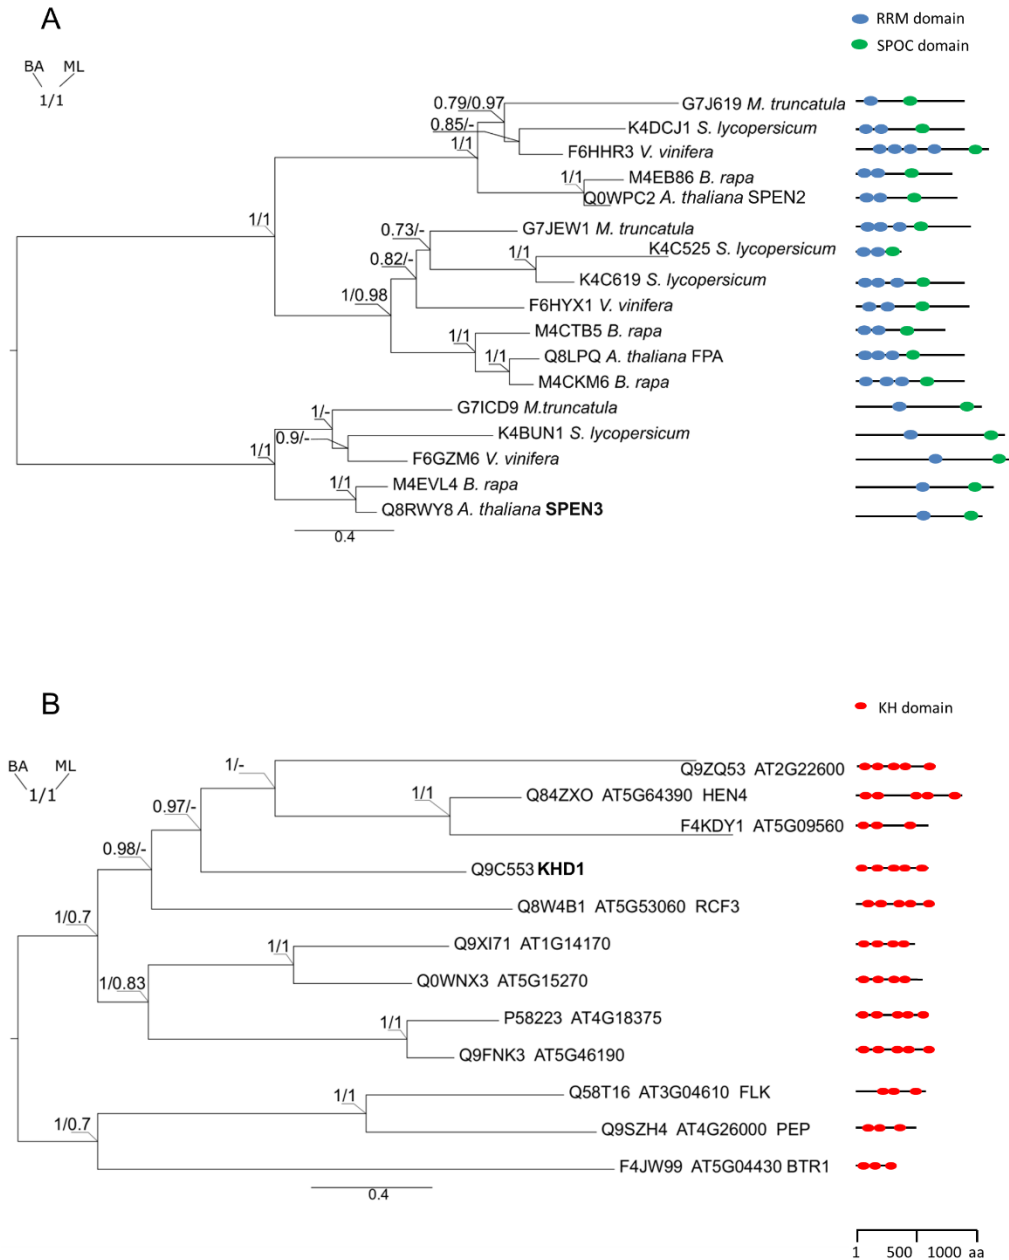

**Fig. S2. Evolutionary relationships of SPEN3 (A) and KHD1 (B) proteins over taxa and within *Arabidopsis thaliana*.** The evolutionary history was inferred from two independent maximum likelihood (ML) and Bayesian approaches (BA) with PhyML (23, 24) and MrBayes 3.2.6 (25), respectively. Both trees were estimated with a best-fit model obtained by MEGA X (26) as JTT + G for SPEN3 (A) and LG + G for KHD1 (B). The analysis involved 17 (A) and 12 (B) amino acid sequences retrieved from the UniProt database. In MrBayes, two independent runs were applied and trees were sampled every 200<sup>th</sup> generation for 5 000 000 generations (with a 25% burn-in). Overall, deviation of split frequencies for all trees used for consensus was much below 0.01. The reliability of the nodes is indicated by their posterior probability values (BA) and bootstrap values (1000 replicates) (ML) presented along the nodes. Node support values below 70% were not shown. The scale bar represents the genetic distance.



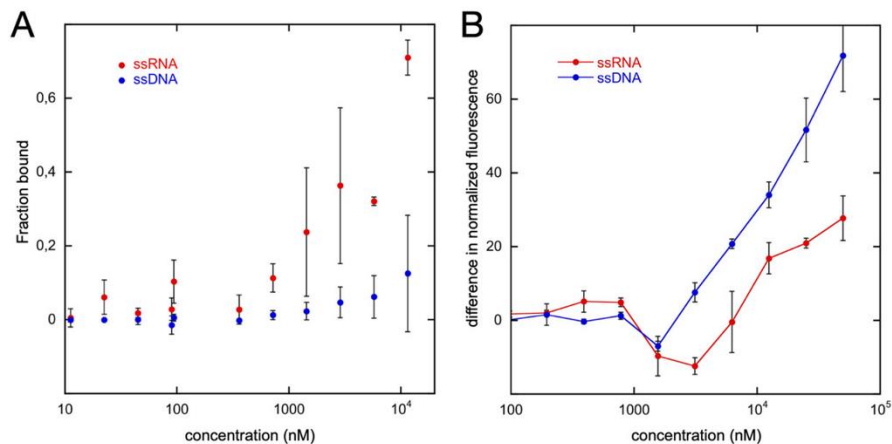

**Fig. S3. MST analysis of SPEN3 and KHD1 interactions with nucleic acids.**

(A) Increasing concentrations of the GST-RRM-SPEN3 protein incubated with 200 nM of 25-nucleotide-long ssRNA or ssDNA of the same sequence. Protein-nucleic acid interactions were quantified by MST. The approximate bound fraction of nucleic acids per tested protein concentration is plotted. (B) Increasing concentrations of binding of 6×His-KHD1-N protein incubated with ssRNA and ssDNA as in (A). Protein-nucleic acid interactions were measured by MST. In case of 6×His-KHD1-N binding to ssRNA and ssDNA, the MST analysis revealed a complex pattern of changes in the thermophoretic mobility of the interacting molecules. Instead of following a typical binding curve with increasing protein concentrations, a significant change in the mobility direction at a protein concentration of 1 μM. At lower concentrations, the protein-nucleic acid complexes moved toward the heated region in the capillary, whereas at higher concentrations (above 4 μM) they left the heated region. This behavior resulted in a “local minimum” of the plotted data that can be interpreted as two dependent binding events, creating two different protein-nucleic acid complexes with different thermophoretic behaviors established each one after the other with increasing protein concentration. The overlay of the thermophoretic properties can result in such plots. As no  $K_D$  or Hill fitting could be applied, the curves can only be described in a qualitative manner. The plot is displayed as changes in normalized fluorescence exhibiting qualitative differences in the presence of RNA or DNA. The “local minimum” was much more pronounced in the presence of RNA and the curve reached a plateau at high protein concentrations. In contrast, in the presence of DNA, the curve did not reach a plateau, hinting at partial DNA binding. Hence, this qualitative analysis supports the EMSA experiments, suggesting improved RNA binding. Measurements were done with three biological and three technical replicates. Error bars indicate standard deviation of the biological replicates.

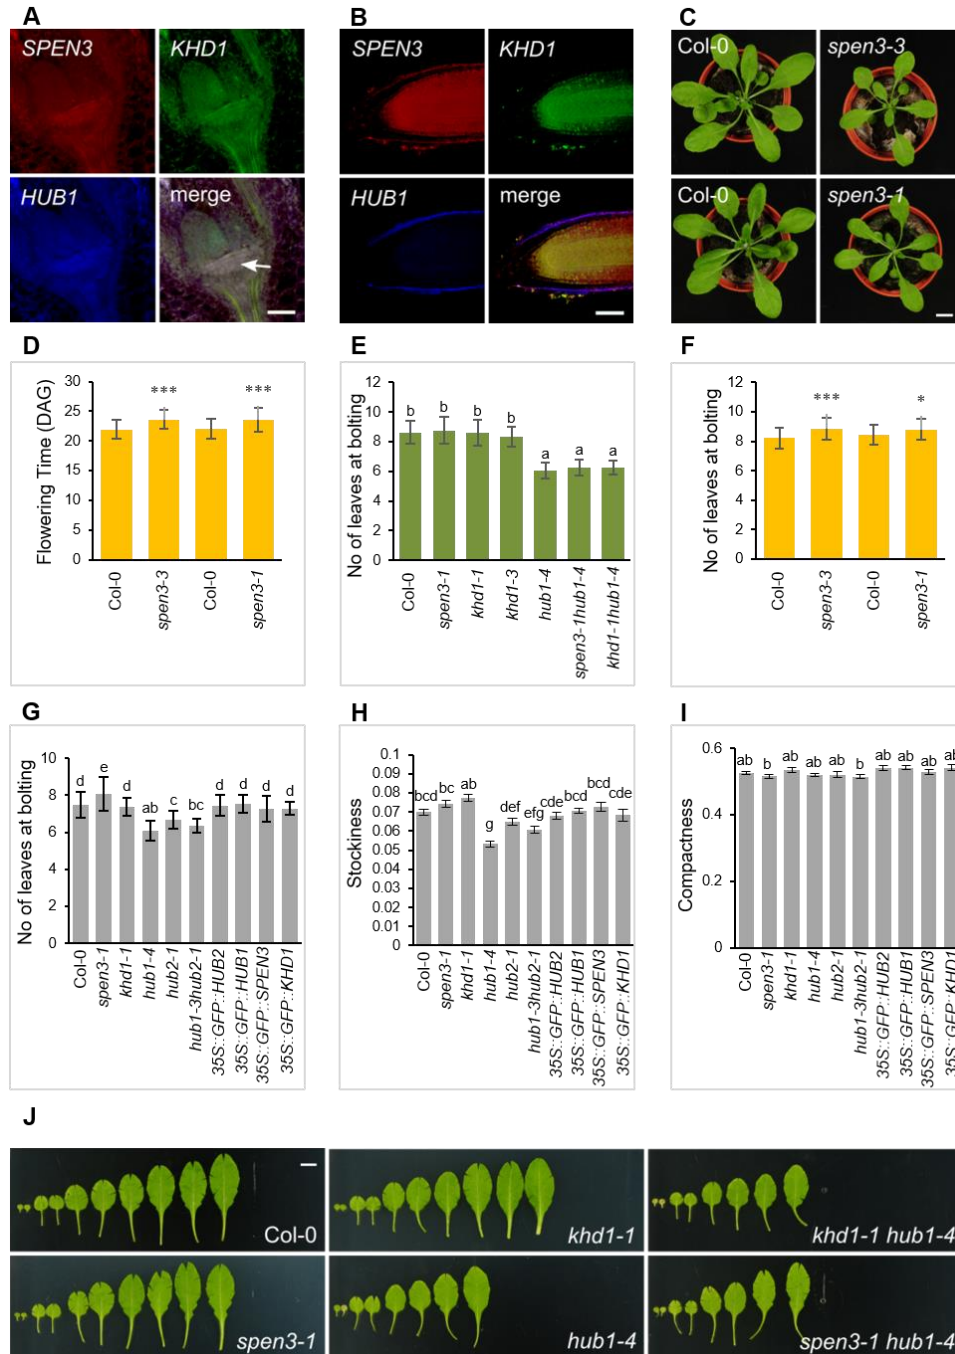

**Fig. S4. *in situ* hybridization and leaf phenotypes of mutants and overexpression lines.**

(A and B) Whole-mount, multiprobe *in situ* hybridization of the shoot apex (A) and the primary root meristem (B). Arrow indicates white-pink merge of *HUB1* (blue samples treated with *HUB1* FITC riboprobe and rabbit anti-FITC followed by AF647 chicken anti-rabbit), *SPEN3* (red samples treated with *SPEN3* Dig-riboprobe and sheep anti-Dig, followed by AF555 Donkey anti-sheep), and *KHD1* (green samples treated with *KHD1* Bio-riboprobe and mouse anti-Bio followed by AF488-Donkey anti-mouse IgG) expression pattern in the shoot apex. (C) Rosette phenotype of the *spen3-3* and *spen3-1* alleles and their Col-0 controls at 25 DAG. (D) Flowering time of *spen3-3* and *spen3-1* and their Col-0 controls grown in jiffy pots ( $n = 50$ ). (E) Number of rosette leaves per seedling at bolting in jiffy pots ( $n = 51$ ). (F) Number

of rosette leaves per seedling at bolting in jiffy pots ( $n = 50$ ). (G) Number of rosette leaves per seedling at bolting grown in the WIWAM-automated platform ( $n = 24$ ). (H) Stockiness and (I) compactness of the rosettes in WIWAM experiment calculated at 23 DAS. (J) Leaf series of 26 DAG seedlings grown in jiffy container experiment. Control, Col-0; single mutants, *spen3-1*, *khd1-1* and *hub1-4*; double mutants, *spen3-1 hub1-4* and *khd1-1 hub1-4*. Error bars represent standard deviations. Ordinary one-way ANOVA with 95% confidence shows a significant difference between the genotypes, represented by the letters (panels E,G,H,I). Asterisks (D and F) indicate statistically significant differences by Student's *t*-test (\* $P < 0.05$ , \*\*\* $P < 0.001$ ).

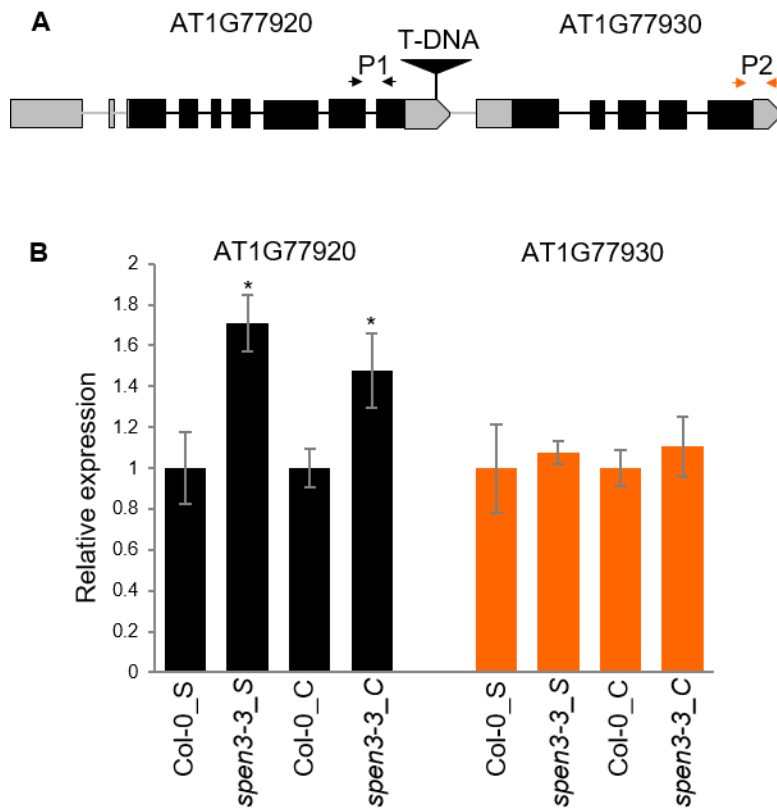

**Fig. S5. Expression levels of genes flanking the second T-DNA insertion in *spen3-3*.**

(A) Scheme of a second T-DNA insertion at the 3' end of *At1g77920* and the 5' end of *At1g77930* in the *spen3-3* allele. (B) qPCR analysis of *At1g77920* and *At1g77930* gene expression levels in seedling (S) and cauline (C) leaf tissue of *spen3-3* and Col-0 control (primers, see Table S3), five biological replicates. Asterisks indicate statistically significant differences by Student's *t*-test (\*  $P < 0.05$ )

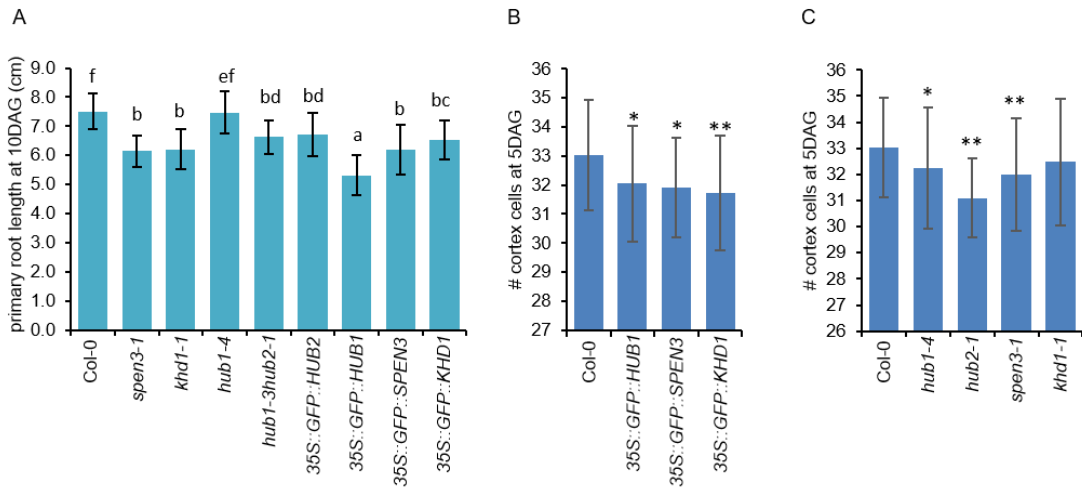

**Fig. S6. Primary root phenotypes of mutants and overexpression lines.**

(A) Primary root length at 10 DAG ( $n \geq 15$ ). (B and C) Root meristem size measured by the number of cortex cells of 5 DAG seedlings of overexpression lines ( $n > 15$ ) (B) and mutant lines ( $n \geq 10$ ) (C). Error bars represent standard deviations. Ordinary one-way ANOVA with 95% confidence shows a significant difference between the genotypes, represented by the letters (panel A). Asterisks (panels B and C) indicate statistically significant differences by Student's  $t$ -test (\* $P < 0.05$ , \*\* $P < 0.01$ ).

**Table S1. AGI codes of the 117 DEGs common to the *hub1-4*, *khd1-1*, and *spen3-1* transcriptomes ( $\log_2FC \geq 0.5$  or  $\log_2FC \leq -0.5$ ,  $P \leq 0.05$ )**

| Gene ID   | Gene name  | Function/process                     | <i>hub1-4</i> vs<br>COL-0:<br>$\log_2FC$ | <i>khd1-1</i> vs<br>COL-0:<br>$\log_2FC$ | <i>spen3-1</i> vs<br>COL-0:<br>$\log_2FC$ |
|-----------|------------|--------------------------------------|------------------------------------------|------------------------------------------|-------------------------------------------|
| AT3G30720 | QQS        | Starch biosynthetic process          | -5.6626                                  | -5.5745                                  | -6.5275                                   |
| AT4G08093 | NA         | Unknown                              | -3.7844                                  | -5.5504                                  | -4.0931                                   |
| AT2G01422 | NA         | Unknown                              | -3.3395                                  | -3.7738                                  | -2.5119                                   |
| AT4G04223 | NA         | Unknown                              | -3.1981                                  | -2.3271                                  | -3.6096                                   |
| AT4G15320 | ATCSLB06   | Cellulose biosynthetic process       | -1.9482                                  | -2.2482                                  | -2.0571                                   |
| AT1G48740 | F1114_9    | Oxidation reduction process          | -1.7234                                  | -1.2481                                  | -1.8338                                   |
| AT1G51055 | NA         | Unknown                              | -1.4514                                  | -1.3610                                  | -1.3864                                   |
| AT1G55320 | AAE18      | Auxin metabolic process              | -1.2355                                  | -0.8119                                  | -0.6587                                   |
| AT4G08991 | NA         | Unknown                              | -1.2329                                  | -1.9179                                  | -1.3986                                   |
| AT5G25970 | T1N24.19   | Transferase activity                 | -1.1978                                  | -0.8172                                  | -1.1685                                   |
| AT5G07640 | NA         | Zinc ion binding                     | -1.1420                                  | -0.9536                                  | -0.9802                                   |
| AT2G39460 | ATRPL23A   | RNA binding                          | -1.0806                                  | -1.0022                                  | -0.6850                                   |
| AT3G05727 | NA         | Unknown                              | -0.9690                                  | -0.6627                                  | -1.0264                                   |
| AT2G29570 | PCNA2      | DNA methylation                      | -0.9243                                  | -0.7950                                  | -0.5766                                   |
| AT3G55660 | ATROPGEF6  | Unknown                              | -0.8981                                  | -0.6359                                  | -0.5877                                   |
| AT5G22440 | RPL10AC    | RNA methylation                      | -0.8793                                  | -0.8620                                  | -0.7202                                   |
| AT5G37010 | NA         | DNA replication                      | -0.8736                                  | -0.7098                                  | -0.4696                                   |
| AT1G52770 | F14G24.4   | Response to light stimulus           | -0.8589                                  | -1.3647                                  | -0.8099                                   |
| AT3G16490 | IQD26      | Calmodulin binding                   | -0.8390                                  | -0.8087                                  | -0.8740                                   |
| AT2G25880 | AtAUR2     | Histone kinase                       | -0.8332                                  | -0.8656                                  | -0.5894                                   |
| AT2G28620 | NA         | DNA replication                      | -0.8305                                  | -0.7375                                  | -0.5404                                   |
| AT2G01020 | NA         | Peptide biosynthetic process         | -0.7982                                  | -0.9755                                  | -0.8181                                   |
| AT2G33400 | F4P9.17    | Unknown                              | -0.7936                                  | -0.5135                                  | -0.6040                                   |
| AT1G18370 | HIK        | Microtubule movement                 | -0.7906                                  | -0.6073                                  | -0.6042                                   |
| AT5G01600 | ATFER1     | Iron ion binding                     | -0.7852                                  | -1.0765                                  | -0.6556                                   |
| AT4G02800 | T5J8.12    | Microtubule cytoskeleton             | -0.7802                                  | -0.6539                                  | -0.5214                                   |
| AT4G03100 | F4C21.2    | Microtubule cytoskeleton             | -0.7608                                  | -0.8148                                  | -0.5114                                   |
| AT1G02780 | emb2386    | RNA methylation                      | -0.7545                                  | -0.6800                                  | -0.9208                                   |
| AT3G23890 | TOPII      | DNA topoisomerase                    | -0.7470                                  | -0.5620                                  | -0.5724                                   |
| AT4G35810 | NA         | Oxidation reduction process          | -0.7201                                  | -0.7203                                  | -0.9608                                   |
| AT3G01710 | NA         | Unknown                              | -0.7187                                  | -0.5457                                  | -0.5202                                   |
| AT4G22505 | NA         | Lipid transport                      | -0.6991                                  | -0.5741                                  | -0.8263                                   |
| AT5G38940 | NA         | Response to salt stress              | -0.6947                                  | -0.7681                                  | -1.0002                                   |
| AT2G38620 | CDKB1      | Regulation of cell cycle             | -0.6756                                  | -0.5173                                  | -0.7126                                   |
| AT5G15200 | RPS9B      | RNA methylation                      | -0.6751                                  | -0.5741                                  | -0.6052                                   |
| AT3G58650 | F14P22.240 | DNA replication                      | -0.6746                                  | -0.6901                                  | -0.6336                                   |
| AT5G60150 | NA         | Petal formation                      | -0.6702                                  | -0.7296                                  | -0.5222                                   |
| AT1G05440 | NA         | DNA methylation                      | -0.6700                                  | -0.7066                                  | -0.5283                                   |
| AT5G44560 | VPS2.2     | Protein binding                      | -0.6659                                  | -0.5251                                  | -0.5011                                   |
| AT2G26760 | CYCB1      | Regulation of cell cycle             | -0.6633                                  | -0.7223                                  | -0.6465                                   |
| AT1G23790 | F5O8.34    | Cell proliferation                   | -0.6442                                  | -0.7267                                  | -0.5978                                   |
| AT3G26050 | NA         | Unknown                              | -0.6299                                  | -0.6320                                  | -0.5259                                   |
| AT5G67270 | ATEB1C     | Microtubule binding                  | -0.6257                                  | -0.6774                                  | -0.6385                                   |
| AT3G19050 | POK2       | Microtubule movement                 | -0.6187                                  | -0.5180                                  | -0.5445                                   |
| AT5G26742 | emb1138    | Embryo development                   | -0.5808                                  | -0.9022                                  | -0.6706                                   |
| AT2G36885 | NA         | Unknown                              | -0.5808                                  | -0.8775                                  | -0.8374                                   |
| AT4G24670 | TAR2       | Cotyledon development                | -0.5388                                  | -0.6692                                  | -0.6080                                   |
| AT2G45490 | AtAUR3     | Histone kinase                       | -0.5322                                  | -0.5612                                  | -0.7462                                   |
| AT2G33560 | BUBR1      | Cell proliferation                   | -0.5258                                  | -0.6428                                  | -0.5698                                   |
| AT4G37490 | CYC1       | Regulation of cell cycle             | -0.5244                                  | -0.7092                                  | -0.6084                                   |
| AT5G35935 | NA         | Transposon                           | 3.8585                                   | 4.0484                                   | 3.9318                                    |
| AT1G19510 | ATRL5      | Regulation of transcription          | 2.6802                                   | 1.7416                                   | 1.6497                                    |
| AT3G10420 | SPD1       | Nucleoside-triphosphatase activity   | 2.4560                                   | 2.4592                                   | 2.6330                                    |
| AT3G05660 | AtRLP33    | Kinase activity                      | 2.4204                                   | 1.4367                                   | 1.4173                                    |
| AT4G08040 | ACS11      | Biosynthetic process                 | 1.8670                                   | 0.9910                                   | 1.2030                                    |
| AT2G34010 | T14G11.13  | Negative regulation of transcription | 1.7997                                   | 1.0896                                   | 0.8731                                    |
| AT1G51820 | NA         | Proline transport                    | 1.6036                                   | 1.9470                                   | 1.5766                                    |
| AT2G26560 | PLP2       | Lipase activity                      | 1.5401                                   | 1.4479                                   | 1.6085                                    |
| AT1G43910 | F9C16_7    | Response to ABA stimulus             | 1.4203                                   | 1.3555                                   | 1.1442                                    |
| AT3G16030 | CES101     | Immune response                      | 1.3967                                   | 1.1568                                   | 1.0114                                    |
| AT4G36280 | CRH1       | ATP binding                          | 1.2300                                   | 0.7077                                   | 0.5734                                    |
| AT5G15510 | NA         | Cell proliferation                   | 1.1310                                   | 0.7409                                   | 1.2072                                    |
| AT5G17860 | CAX7       | Transmembrane transport              | 1.1310                                   | 0.7409                                   | 1.2072                                    |

|           |            |                                            |         |         |         |
|-----------|------------|--------------------------------------------|---------|---------|---------|
| AT1G62510 | NA         | Lipid transport                            | 1.1214  | 0.9785  | 0.8740  |
| AT5G38970 | BR6OX1     | Oxidation reduction process                | 1.1193  | 1.2404  | 1.2257  |
| AT1G52880 | NAM        | Regulation of transcription                | 1.1080  | 0.7682  | 0.9576  |
| AT4G11900 | NA         | Protein phosphorylation                    | 1.0676  | 0.7431  | 0.7588  |
| AT3G53250 | T4D2.180   | Response to auxin stimulus                 | 1.0341  | 0.9364  | 0.7971  |
| AT3G62860 | F26K9_290  | Catalytic activity                         | 1.0282  | 1.0083  | 0.7175  |
| AT1G72430 | T10D10.10  | Response to auxin stimulus                 | 0.9981  | 1.0623  | 0.8578  |
| AT1G21270 | WAK2       | Oligosaccharide metabolic process          | 0.9727  | 0.7971  | 0.6735  |
| AT5G64780 | NA         | Unknown                                    | 0.9604  | 0.6438  | 0.5608  |
| AT2G39980 | NA         | Response to karrikin                       | 0.9578  | 0.6103  | 0.5734  |
| AT3G61430 | PIP1A      | Water channel activity                     | 0.9367  | 0.7735  | 0.5416  |
| AT4G18010 | IP5PII     | Inositol tri-phosphate metabolic process   | 0.8834  | 1.2286  | 0.6841  |
| AT3G56000 | ATCSLA14   | Transferase activity                       | 0.8726  | 0.9119  | 0.7815  |
| AT3G48720 | T8P19.230  | Cutin biosynthetic process                 | 0.8433  | 0.8613  | 0.6017  |
| AT5G08150 | SOB5       | Cytokinin metabolism process               | 0.8382  | 1.1877  | 0.6384  |
| AT1G23130 | T26J12.10  | Defense response                           | 0.8248  | 0.9054  | 0.6017  |
| AT3G12090 | TET6       | Transition metal ion transport             | 0.8139  | 0.6686  | 0.6863  |
| AT5G24030 | SLAH3      | Nitrate transport                          | 0.7619  | 0.9383  | 0.6074  |
| AT2G31730 | BHLH-BETA  | Response to ethylene and GA stimulus       | 0.7106  | 0.8444  | 0.6729  |
| AT5G07000 | ATST2B     | Sulfotransferase activity                  | 0.6955  | 0.9848  | 0.6295  |
| AT3G07340 | BHLH62     | Regulation of transcription                | 0.6624  | 0.6468  | 0.5896  |
| AT4G23190 | CRK11      | Kinase activity                            | 0.6350  | 0.7084  | 0.8002  |
| AT5G23750 | MRO11.3    | Cell wall biogenesis                       | 0.5664  | 0.6600  | 0.7512  |
| AT4G32790 | F4D11.10   | Catalytic activity                         | 0.5664  | 0.5992  | 0.5092  |
| AT2G41330 | NA         | Cell redox homeostasis                     | 0.5613  | 0.6276  | 0.7785  |
| AT2G23690 | NA         | Protein myristoylation                     | 0.5438  | 0.7003  | 0.8397  |
| AT1G02820 | F22D16.18  | Embryo development                         | -1.7547 | -1.2409 | 1.2362  |
| AT1G62540 | FMO GS-OX2 | Oxidation reduction process                | -1.4021 | -0.9912 | 0.9452  |
| AT4G26790 | NA         | Lipid metabolic process                    | -1.1570 | -1.1056 | 0.8255  |
| AT3G21670 | NRT1.3     | Oligopeptide transport                     | -1.1033 | -1.0078 | 0.9084  |
| AT1G16730 | UP6        | Fatty acid beta oxydation                  | -1.0651 | -1.2906 | 1.0012  |
| AT4G37310 | CYP81H1    | Oxidation reduction process                | -1.0019 | -0.7621 | 0.5620  |
| AT2G46680 | ATHB-7     | Regulation of transcription                | -0.9295 | -0.6854 | 0.6970  |
| AT1G73390 | T9L24.40   | Protein myristoylation                     | -0.9262 | -0.6509 | 0.6113  |
| AT2G17300 | NA         | Unknown                                    | -0.7890 | -0.5806 | 0.5410  |
| AT5G03760 | ATCSLA09   | Calcium ion transport                      | -0.7349 | -0.7330 | 0.7095  |
| AT5G61290 | NA         | Oxidation reduction process                | -0.6413 | -0.7854 | 0.7625  |
| AT1G64770 | NDF2       | Carbohydrate metabolic process             | -0.5301 | -0.5406 | 0.5175  |
| AT4G37770 | ACS8       | Biosynthetic process                       | 1.7545  | 2.0780  | -1.8580 |
| AT4G40065 | NA         | Unknown                                    | 1.4381  | 1.1595  | -1.3468 |
| AT2G23170 | GH3.3      | Response to auxin stimulus                 | 1.4334  | 1.2295  | -0.7410 |
| AT2G18010 | SAUR10     | Response to auxin stimulus                 | 1.3172  | 1.5038  | -1.1684 |
| AT3G42800 | T21C14_20  | Unknown                                    | 1.1613  | 1.4009  | -0.8314 |
| AT1G04610 | YUC3       | Oxidation reduction process                | 0.8388  | 1.2292  | -1.9934 |
| AT1G30420 | ATMRP12    | Transmembrane transport                    | 0.5738  | 0.5111  | -1.0747 |
| AT1G51830 | T14L22.4   | Nitrate transport                          | -1.5491 | 1.2138  | -1.0585 |
| AT4G20320 | F1C12.230  | Pyrimidine nucleotide biosynthetic process | -1.4217 | -0.8890 | -0.5056 |
| AT4G30170 | PER45      | Oxidation reduction process                | -1.2226 | 1.4707  | -1.1787 |
| AT3G32925 | NA         | Transposon                                 | 2.4493  | -2.0186 | 1.4498  |
| AT5G59670 | NA         | Protein phosphorylation                    | 1.2640  | -1.1608 | 1.5756  |
| AT1G73000 | PYL3       | Unknown                                    | 1.2088  | -1.0563 | 1.6080  |
| AT1G11070 | NA         | Unknown                                    | 0.9290  | -0.6423 | 0.8314  |
| AT1G78000 | SULTR1     | Nitrate transport                          | -1.5906 | 0.6725  | 0.8204  |
| AT3G54160 | F24B22.120 | Unknown                                    | 0.9710  | -1.2585 | -1.0686 |

\**P* values for all  $\log_2FC \leq 0.05$ .

**Table S2.** PLAZA enrichment of Biological Process Gene Ontology (GO) categories identified within genes down- or upregulated in the indicated mutants. For the single mutants, only the mutant-specific down- or upregulated genes are presented. The GO ratio is the ratio between the number of analyzed annotated genes that belong to the given GO category and the number of all analyzed annotated genes.

| GO term                                                                   | Log2-Enrichment | P value  | GO ratio (%) | Description                                          |
|---------------------------------------------------------------------------|-----------------|----------|--------------|------------------------------------------------------|
| <b>Down-regulated in <i>hub1-4</i>, <i>khd1-1</i>, and <i>spen3-1</i></b> |                 |          |              |                                                      |
| GO:0051726                                                                | 4.63            | 5.67E-04 | 12           | Regulation of cell cycle                             |
| GO:0016572                                                                | 8.32            | 4.0E-03  | 5            | Histone phosphorylation                              |
| GO:0007049                                                                | 3.40            | 3.00E-02 | 12           | Cell cycle                                           |
| <b>Down-regulated in <i>hub1-4</i> and <i>spen3-1</i></b>                 |                 |          |              |                                                      |
| GO:0051726                                                                | 3.71            | 2.00E-02 | 6            | Regulation of cell cycle                             |
| GO:0016572                                                                | 7.40            | 3.00E-02 | 2            | Histone phosphorylation                              |
| <b>Down-regulated in <i>hub1-4</i> and <i>khd1-1</i></b>                  |                 |          |              |                                                      |
| GO:0008152                                                                | 0.54            | 4.52E-17 | 61           | Metabolic process                                    |
| GO:0019748                                                                | 2.13            | 4.61E-16 | 9            | Secondary metabolic process                          |
| GO:0006260                                                                | 3.09            | 9.67E-13 | 4            | Cellular DNA replication                             |
| GO:0006259                                                                | 2.22            | 1.73E-12 | 7            | Cellular DNA metabolic process                       |
| GO:0044238                                                                | 0.53            | 6.76E-12 | 51           | Primary metabolic process                            |
| GO:0044237                                                                | 0.53            | 3.52E-11 | 49           | Cellular metabolic process                           |
| GO:0044281                                                                | 1.24            | 4.94E-11 | 16           | Small molecule metabolic process                     |
| GO:0006519                                                                | 1.76            | 9.67E-11 | 9            | Cellular amino acid and derivative metabolic process |
| GO:0016144                                                                | 3.62            | 1.52E-10 | 3            | S-glycoside biosynthetic process                     |
| GO:0019758                                                                | 3.62            | 1.52E-10 | 3            | Glycosinolate biosynthetic process                   |
| GO:0019761                                                                | 3.62            | 1.52E-10 | 3            | Glucosinolate biosynthetic process                   |
| GO:0009812                                                                | 3.23            | 1.64E-10 | 3            | Flavonoid metabolic process                          |
| GO:0009987                                                                | 0.42            | 2.07E-10 | 60           | Cellular process                                     |
| GO:0009813                                                                | 3.30            | 2.84E-10 | 3            | Flavonoid biosynthetic process                       |
| GO:0009058                                                                | 0.70            | 4.05E-10 | 33           | Biosynthetic process                                 |
| GO:0034637                                                                | 2.36            | 6.90E-10 | 5            | Cellular carbohydrate biosynthetic process           |
| GO:0044249                                                                | 0.70            | 8.93E-10 | 33           | Cellular biosynthetic process                        |
| GO:0044283                                                                | 1.59            | 3.03E-09 | 9            | Small molecule biosynthetic process                  |
| GO:0009698                                                                | 2.50            | 3.42E-09 | 4            | Phenylpropanoid metabolic process                    |
| GO:0006807                                                                | 0.79            | 4.56E-09 | 26           | Nitrogen compound metabolic process                  |
| GO:0016137                                                                | 2.62            | 4.79E-09 | 4            | Glycoside metabolic process                          |
| GO:0016138                                                                | 3.07            | 5.27E-09 | 3            | Glycoside biosynthetic process                       |
| GO:0016143                                                                | 2.92            | 8.79E-09 | 3            | S-glycoside metabolic process                        |
| GO:0019757                                                                | 2.92            | 8.79E-09 | 3            | Glycosinolate metabolic process                      |
| GO:0019760                                                                | 2.92            | 8.79E-09 | 3            | Glucosinolate metabolic process                      |
| GO:0009699                                                                | 2.63            | 1.12E-08 | 4            | Phenylpropanoid biosynthetic process                 |
| GO:0042398                                                                | 2.26            | 5.03E-08 | 5            | Cellular amino acid derivative biosynthetic process  |
| GO:0019438                                                                | 2.21            | 5.06E-08 | 5            | Aromatic compound biosynthetic process               |
| GO:0006725                                                                | 1.87            | 5.39E-08 | 6            | Cellular aromatic compound metabolic process         |
| GO:0006790                                                                | 2.25            | 5.93E-08 | 5            | Sulfur metabolic process                             |
| GO:0016051                                                                | 2.07            | 9.32E-08 | 5            | Carbohydrate biosynthetic process                    |
| GO:0007049                                                                | 2.14            | 1.47E-07 | 5            | Cell cycle                                           |
| GO:0006575                                                                | 2.00            | 1.50E-07 | 5            | Cellular amino acid derivative metabolic process     |
| GO:0044272                                                                | 2.73            | 2.87E-07 | 3            | Sulfur compound biosynthetic process                 |
| GO:0005975                                                                | 1.21            | 2.53E-06 | 10           | Carbohydrate metabolic process                       |
| GO:0050896                                                                | 0.61            | 2.58E-06 | 29           | Response to stimulus                                 |
| GO:0044262                                                                | 1.49            | 6.89E-06 | 7            | Cellular carbohydrate metabolic process              |
| GO:0022402                                                                | 2.31            | 1.22E-05 | 3            | Cell cycle process                                   |
| GO:0042440                                                                | 2.48            | 1.22E-05 | 3            | Pigment metabolic process                            |
| GO:0043455                                                                | 3.52            | 1.31E-05 | 2            | Regulation of secondary metabolic process            |
| GO:0010439                                                                | 5.36            | 2.42E-05 | 1            | Regulation of glucosinolate biosynthetic process     |
| GO:0000103                                                                | 4.34            | 2.64E-05 | 1            | Sulfate assimilation                                 |
| GO:0006791                                                                | 4.18            | 6.57E-05 | 1            | Sulfur utilization                                   |
| GO:0006261                                                                | 3.08            | 6.78E-05 | 2            | DNA-dependent DNA replication                        |
| GO:0034285                                                                | 2.85            | 1.07E-04 | 2            | Response to disaccharide stimulus                    |
| GO:0006270                                                                | 4.51            | 1.23E-04 | 1            | DNA replication initiation                           |
| GO:0006950                                                                | 0.71            | 1.68E-04 | 19           | Response to stress                                   |
| GO:0046148                                                                | 2.45            | 3.03E-04 | 3            | Pigment biosynthetic process                         |
| GO:0006281                                                                | 2.07            | 3.43E-04 | 3            | DNA repair                                           |



|            |      |          |    |                                                                                 |
|------------|------|----------|----|---------------------------------------------------------------------------------|
| GO:0034984 | 2.07 | 3.67E-04 | 3  | Cellular response to DNA damage stimulus                                        |
| GO:0009744 | 2.82 | 4.69E-04 | 2  | Response to sucrose stimulus                                                    |
| GO:0043255 | 4.78 | 4.79E-04 | 1  | Regulation of carbohydrate biosynthetic process                                 |
| GO:0044271 | 1.57 | 4.94E-04 | 5  | Cellular nitrogen compound biosynthetic process                                 |
| GO:0006139 | 0.66 | 5.11E-04 | 19 | Cellular nucleobase, nucleoside, nucleotide, and nucleic acid metabolic process |
| GO:0006974 | 2.01 | 6.27E-04 | 3  | Response to DNA damage stimulus                                                 |
| GO:0009309 | 2.01 | 6.27E-04 | 3  | Amine biosynthetic process                                                      |
| GO:0010675 | 4.62 | 9.38E-04 | 1  | Regulation of cellular carbohydrate metabolic process                           |
| GO:0009753 | 1.90 | 9.81E-04 | 3  | Response to jasmonic acid stimulus                                              |
| GO:0006996 | 1.20 | 2.20E-03 | 7  | Organelle organization                                                          |
| GO:0008652 | 2.02 | 2.50E-03 | 3  | Cellular amino acid biosynthetic process                                        |
| GO:0033205 | 3.48 | 2.70E-03 | 1  | Cytokinesis during cell cycle                                                   |
| GO:0006268 | 4.36 | 2.80E-03 | 1  | DNA unwinding during replication                                                |
| GO:0033554 | 1.38 | 4.00E-03 | 5  | Cellular response to stress                                                     |
| GO:0016043 | 0.93 | 4.20E-03 | 10 | Cellular component organization                                                 |
| GO:0042762 | 4.25 | 4.50E-03 | 1  | Regulation of sulfur metabolic process                                          |
| GO:0008283 | 2.64 | 4.80E-03 | 2  | Cell proliferation                                                              |
| GO:0042180 | 1.09 | 1.00E-02 | 7  | Cellular ketone metabolic process                                               |
| GO:0051716 | 1.02 | 1.00E-02 | 8  | Cellular response to stimulus                                                   |
| GO:0046283 | 3.30 | 1.00E-02 | 1  | Anthocyanin metabolic process                                                   |
| GO:0006109 | 4.14 | 1.00E-02 | 1  | Regulation of carbohydrate metabolic process                                    |
| GO:0044106 | 1.40 | 1.00E-02 | 4  | Cellular amine metabolic process                                                |
| GO:0034641 | 1.16 | 1.00E-02 | 6  | Cellular nitrogen compound metabolic process                                    |
| GO:0042221 | 0.58 | 1.00E-02 | 18 | Response to chemical stimulus                                                   |
| GO:0051726 | 2.20 | 1.00E-02 | 2  | Regulation of cell cycle                                                        |
| GO:0009308 | 1.14 | 2.00E-02 | 6  | Amine metabolic process                                                         |
| GO:0006520 | 1.42 | 2.00E-02 | 4  | Cellular amino acid metabolic process                                           |
| GO:0019752 | 1.03 | 2.00E-02 | 7  | Carboxylic acid metabolic process                                               |
| GO:0043436 | 1.03 | 2.00E-02 | 7  | Oxoacid metabolic process                                                       |
| GO:0032392 | 3.86 | 2.00E-02 | 1  | DNA geometric change                                                            |
| GO:0032508 | 3.86 | 2.00E-02 | 1  | DNA duplex unwinding                                                            |
| GO:0006082 | 1.03 | 2.00E-02 | 7  | Organic acid metabolic process                                                  |
| GO:0009628 | 0.69 | 3.00E-02 | 13 | Response to abiotic stimulus                                                    |
| GO:0000910 | 2.72 | 3.00E-02 | 1  | Cytokinesis                                                                     |
| GO:0007018 | 2.49 | 3.00E-02 | 2  | Microtubule-based movement                                                      |
| GO:0007017 | 2.06 | 3.00E-02 | 2  | Microtubule-based process                                                       |
| GO:0009411 | 1.76 | 4.00E-02 | 3  | Response to UV                                                                  |
| GO:0019419 | 5.21 | 4.00E-02 | 1  | Sulfate reduction                                                               |
| GO:0051276 | 1.60 | 5.00E-02 | 3  | Chromosome organization                                                         |

**Down-regulated specifically in *hub1-4***

|            |      |          |    |                                         |
|------------|------|----------|----|-----------------------------------------|
| GO:0050896 | 0.96 | 2.40E-30 | 37 | Response to stimulus                    |
| GO:0006950 | 1.20 | 5.99E-29 | 26 | Response to stress                      |
| GO:0042221 | 1.13 | 3.33E-25 | 26 | Response to chemical stimulus           |
| GO:0019748 | 2.12 | 2.47E-23 | 9  | Secondary metabolic process             |
| GO:0006970 | 1.85 | 3.67E-22 | 11 | Response to osmotic stress              |
| GO:0009651 | 1.86 | 7.93E-21 | 10 | Response to salt stress                 |
| GO:0010035 | 1.82 | 3.71E-20 | 10 | Response to inorganic substance         |
| GO:0016137 | 2.88 | 9.30E-20 | 5  | Glycoside metabolic process             |
| GO:0010038 | 1.86 | 4.49E-18 | 9  | Response to metal ion                   |
| GO:0016143 | 3.13 | 1.15E-17 | 4  | S-glycoside metabolic process           |
| GO:0019757 | 3.13 | 1.15E-17 | 4  | Glycosinolate metabolic process         |
| GO:0019760 | 3.13 | 1.15E-17 | 4  | Glucosinolate metabolic process         |
| GO:0006952 | 1.59 | 1.36E-17 | 11 | Defense response                        |
| GO:0005975 | 1.48 | 1.64E-17 | 13 | Carbohydrate metabolic process          |
| GO:0009628 | 1.17 | 6.67E-17 | 18 | Response to abiotic stimulus            |
| GO:0009607 | 1.49 | 1.24E-16 | 12 | Response to biotic stimulus             |
| GO:0051707 | 1.49 | 2.36E-16 | 12 | Response to other organism              |
| GO:0006790 | 2.45 | 3.19E-16 | 5  | Sulfur metabolic process                |
| GO:0009611 | 2.36 | 9.08E-15 | 5  | Response to wounding                    |
| GO:0051704 | 1.30 | 4.60E-14 | 13 | Multi-organism process                  |
| GO:0044283 | 1.59 | 8.36E-14 | 9  | Small molecule biosynthetic process     |
| GO:0008152 | 0.41 | 5.47E-13 | 56 | Metabolic process                       |
| GO:0044262 | 1.67 | 1.10E-12 | 8  | Cellular carbohydrate metabolic process |
| GO:0009605 | 1.73 | 7.82E-12 | 7  | Response to external stimulus           |
| GO:0009753 | 2.29 | 1.06E-11 | 4  | Response to jasmonic acid stimulus      |
| GO:0009266 | 1.58 | 2.51E-11 | 8  | Response to temperature stimulus        |
| GO:0010043 | 2.70 | 3.23E-11 | 3  | Response to zinc ion                    |
| GO:0006030 | 2.31 | 9.64E-11 | 4  | Chitin metabolic process                |
| GO:0006022 | 2.29 | 1.39E-10 | 4  | Aminoglycan metabolic process           |

|            |      |          |    |                                                      |
|------------|------|----------|----|------------------------------------------------------|
| GO:0044036 | 2.18 | 4.61E-10 | 4  | Cell wall macromolecule metabolic process            |
| GO:0009409 | 1.67 | 5.73E-10 | 6  | Response to cold                                     |
| GO:0044281 | 1.04 | 5.85E-10 | 14 | Small molecule metabolic process                     |
| GO:0046686 | 1.68 | 7.44E-10 | 6  | Response to cadmium ion                              |
| GO:0006037 | 2.33 | 8.66E-10 | 4  | Cell wall chitin metabolic process                   |
| GO:0071555 | 2.33 | 8.66E-10 | 4  | Cell wall organization                               |
| GO:0010383 | 2.25 | 1.73E-09 | 4  | Cell wall polysaccharide metabolic process           |
| GO:0016138 | 2.72 | 2.24E-08 | 3  | Glycoside biosynthetic process                       |
| GO:0055114 | 1.19 | 2.30E-08 | 10 | Oxidation reduction                                  |
| GO:0016144 | 3.13 | 2.68E-08 | 2  | S-glycoside biosynthetic process                     |
| GO:0019758 | 3.13 | 2.68E-08 | 2  | Glycosinolate biosynthetic process                   |
| GO:0019761 | 3.13 | 2.68E-08 | 2  | Glucosinolate biosynthetic process                   |
| GO:0005976 | 1.77 | 2.96E-08 | 5  | Polysaccharide metabolic process                     |
| GO:0010033 | 0.91 | 3.74E-08 | 14 | Response to organic substance                        |
| GO:0044272 | 2.52 | 3.87E-08 | 3  | Sulfur compound biosynthetic process                 |
| GO:0006629 | 1.31 | 4.34E-08 | 8  | Lipid metabolic process                              |
| GO:0071554 | 1.87 | 8.57E-08 | 4  | Cell wall organization or biogenesis                 |
| GO:0009308 | 1.38 | 1.12E-07 | 7  | Amine metabolic process                              |
| GO:0016053 | 1.62 | 2.00E-07 | 5  | Organic acid biosynthetic process                    |
| GO:0046394 | 1.62 | 2.00E-07 | 5  | Carboxylic acid biosynthetic process                 |
| GO:0016145 | 3.21 | 2.16E-07 | 2  | S-glycoside catabolic process                        |
| GO:0019759 | 3.21 | 2.16E-07 | 2  | Glycosinolate catabolic process                      |
| GO:0019762 | 3.21 | 2.16E-07 | 2  | Glucosinolate catabolic process                      |
| GO:0016139 | 2.94 | 2.24E-07 | 2  | Glycoside catabolic process                          |
| GO:0009058 | 0.53 | 2.84E-07 | 30 | Biosynthetic process                                 |
| GO:0044238 | 0.37 | 3.22E-07 | 46 | Primary metabolic process                            |
| GO:0009414 | 1.67 | 6.66E-07 | 5  | Response to water deprivation                        |
| GO:0044273 | 3.08 | 7.88E-07 | 2  | Sulfur compound catabolic process                    |
| GO:0080028 | 3.39 | 8.63E-07 | 2  | Nitrile biosynthetic process                         |
| GO:0042398 | 1.93 | 8.77E-07 | 4  | Cellular amino acid derivative biosynthetic process  |
| GO:0019438 | 1.86 | 1.21E-06 | 4  | Aromatic compound biosynthetic process               |
| GO:0009415 | 1.63 | 1.29E-06 | 5  | Response to water                                    |
| GO:0050898 | 3.32 | 1.61E-06 | 2  | Nitrile metabolic process                            |
| GO:0080027 | 3.32 | 1.61E-06 | 2  | Response to herbivore                                |
| GO:0044249 | 0.51 | 1.89E-06 | 29 | Cellular biosynthetic process                        |
| GO:0006575 | 1.68 | 2.49E-06 | 4  | Cellular amino acid derivative metabolic process     |
| GO:0050832 | 1.93 | 2.90E-06 | 3  | Defense response to fungus                           |
| GO:0016051 | 1.72 | 4.12E-06 | 4  | Carbohydrate biosynthetic process                    |
| GO:0006519 | 1.30 | 4.79E-06 | 6  | Cellular amino acid and derivative metabolic process |
| GO:0009699 | 2.14 | 6.73E-06 | 3  | Phenylpropanoid biosynthetic process                 |
| GO:0034637 | 1.82 | 8.96E-06 | 4  | Cellular carbohydrate biosynthetic process           |
| GO:0019752 | 1.15 | 1.21E-05 | 7  | Carboxylic acid metabolic process                    |
| GO:0043436 | 1.15 | 1.21E-05 | 7  | Oxoacid metabolic process                            |
| GO:0006082 | 1.14 | 1.31E-05 | 7  | Organic acid metabolic process                       |
| GO:0016052 | 1.82 | 1.51E-05 | 3  | Carbohydrate catabolic process                       |
| GO:0009698 | 1.94 | 1.90E-05 | 3  | Phenylpropanoid metabolic process                    |
| GO:0042180 | 1.13 | 1.96E-05 | 7  | Cellular ketone metabolic process                    |
| GO:0006631 | 1.83 | 2.36E-05 | 3  | Fatty acid metabolic process                         |
| GO:0044271 | 1.49 | 2.56E-05 | 5  | Cellular nitrogen compound biosynthetic process      |
| GO:0006725 | 1.45 | 3.46E-05 | 5  | Cellular aromatic compound metabolic process         |
| GO:0033037 | 3.32 | 3.87E-05 | 1  | Polysaccharide localization                          |
| GO:0051716 | 1.04 | 3.88E-05 | 8  | Cellular response to stimulus                        |
| GO:0009719 | 0.91 | 3.96E-05 | 10 | Response to endogenous stimulus                      |
| GO:0042742 | 1.60 | 4.78E-05 | 4  | Defense response to bacterium                        |
| GO:0009987 | 0.26 | 5.97E-05 | 54 | Cellular process                                     |
| GO:0006979 | 1.50 | 8.26E-05 | 4  | Response to oxidative stress                         |
| GO:0032787 | 1.40 | 1.19E-04 | 5  | Monocarboxylic acid metabolic process                |
| GO:0052543 | 3.39 | 1.20E-04 | 1  | Callose deposition in cell wall                      |
| GO:0052386 | 3.34 | 1.64E-04 | 1  | Cell wall thickening                                 |
| GO:0009620 | 1.42 | 1.89E-04 | 4  | Response to fungus                                   |
| GO:0044275 | 1.81 | 2.11E-04 | 3  | Cellular carbohydrate catabolic process              |
| GO:0007155 | 2.74 | 2.13E-04 | 2  | Cell adhesion                                        |
| GO:0022610 | 2.74 | 2.13E-04 | 2  | Biological adhesion                                  |
| GO:0052545 | 3.30 | 2.21E-04 | 1  | Callose localization                                 |
| GO:0009664 | 2.46 | 2.45E-04 | 2  | Plant-type cell wall organization                    |
| GO:0006633 | 1.96 | 4.90E-04 | 2  | Fatty acid biosynthetic process                      |
| GO:0009269 | 3.17 | 5.11E-04 | 1  | Response to desiccation                              |
| GO:0034641 | 1.10 | 9.25E-04 | 6  | Cellular nitrogen compound metabolic process         |
| GO:0042430 | 2.48 | 1.50E-03 | 2  | Indole and derivative metabolic process              |
| GO:0042434 | 2.48 | 1.50E-03 | 2  | Indole derivative metabolic process                  |

|            |      |          |    |                                                         |
|------------|------|----------|----|---------------------------------------------------------|
| GO:0071669 | 1.96 | 1.90E-03 | 2  | Plant-type cell wall organization or biogenesis         |
| GO:0006807 | 0.47 | 2.20E-03 | 21 | Nitrogen compound metabolic process                     |
| GO:0044255 | 1.19 | 2.50E-03 | 5  | Cellular lipid metabolic process                        |
| GO:0042435 | 2.52 | 3.20E-03 | 1  | Indole derivative biosynthetic process                  |
| GO:0009908 | 1.31 | 3.20E-03 | 4  | Flower development                                      |
| GO:0052482 | 3.23 | 1.00E-02 | 1  | Cell wall thickening during defense response            |
| GO:0052544 | 3.23 | 1.00E-02 | 1  | Callose deposition in cell wall during defense response |
| GO:0042343 | 3.54 | 1.00E-02 | 1  | Indole glucosinolate metabolic process                  |
| GO:0010143 | 3.99 | 1.00E-02 | 1  | Cutin biosynthetic process                              |
| GO:0007275 | 0.54 | 1.00E-02 | 15 | Multicellular organismal development                    |
| GO:0005985 | 2.88 | 1.00E-02 | 1  | Sucrose metabolic process                               |
| GO:0052542 | 3.13 | 1.00E-02 | 1  | Callose deposition during defense response              |
| GO:0031668 | 1.73 | 2.00E-02 | 2  | Cellular response to extracellular stimulus             |
| GO:0071496 | 1.73 | 2.00E-02 | 2  | Cellular response to external stimulus                  |
| GO:0009759 | 3.86 | 2.00E-02 | 1  | Indole glucosinolate biosynthetic process               |
| GO:0080119 | 3.86 | 2.00E-02 | 1  | ER body organization                                    |
| GO:0009684 | 3.39 | 2.00E-02 | 1  | Indoleacetic acid biosynthetic process                  |
| GO:0044237 | 0.25 | 2.00E-02 | 40 | Cellular metabolic process                              |
| GO:0033554 | 1.12 | 2.00E-02 | 4  | Cellular response to stress                             |
| GO:0032501 | 0.51 | 2.00E-02 | 15 | Multicellular organismal process                        |
| GO:0009408 | 1.68 | 2.00E-02 | 2  | Response to heat                                        |
| GO:0009683 | 3.32 | 2.00E-02 | 1  | Indoleacetic acid metabolic process                     |
| GO:0032502 | 0.50 | 3.00E-02 | 15 | Developmental process                                   |
| GO:0031669 | 1.80 | 3.00E-02 | 2  | Cellular response to nutrient levels                    |
| GO:0009751 | 1.60 | 3.00E-02 | 2  | Response to salicylic acid stimulus                     |
| GO:0042545 | 1.77 | 4.00E-02 | 2  | Cell wall modification                                  |
| GO:0009991 | 1.61 | 4.00E-02 | 2  | Response to extracellular stimulus                      |
| GO:0006869 | 1.73 | 5.00E-02 | 2  | Lipid transport                                         |

**Down-regulated specifically in *khd1-1***

|            |      |          |    |                                                                                               |
|------------|------|----------|----|-----------------------------------------------------------------------------------------------|
| GO:0006259 | 2.56 | 2.35E-17 | 9  | Cellular DNA metabolic process                                                                |
| GO:0006139 | 1.15 | 6.27E-16 | 27 | Cellular nucleobase, nucleoside, nucleotide, and nucleic acid metabolic process               |
| GO:0006807 | 0.90 | 1.11E-10 | 28 | Nitrogen compound metabolic process                                                           |
| GO:0006260 | 3.06 | 3.86E-10 | 4  | Cellular DNA replication                                                                      |
| GO:0022402 | 2.46 | 5.21E-06 | 4  | Cell cycle process                                                                            |
| GO:0007049 | 2.01 | 6.90E-05 | 4  | Cell cycle                                                                                    |
| GO:0048367 | 1.89 | 6.92E-05 | 5  | Shoot development                                                                             |
| GO:0022621 | 1.87 | 9.28E-05 | 5  | Shoot system development                                                                      |
| GO:0044260 | 0.49 | 9.93E-05 | 36 | Cellular macromolecule metabolic process                                                      |
| GO:0006261 | 3.18 | 1.37E-04 | 2  | DNA-dependent DNA replication                                                                 |
| GO:0048827 | 2.05 | 1.90E-04 | 4  | Phyllome development                                                                          |
| GO:0043170 | 0.44 | 3.85E-04 | 39 | Macromolecule metabolic process                                                               |
| GO:0006281 | 2.13 | 7.89E-04 | 3  | DNA repair                                                                                    |
| GO:0034984 | 2.13 | 8.39E-04 | 3  | Cellular response to DNA damage stimulus                                                      |
| GO:0009987 | 0.30 | 1.20E-03 | 55 | Cellular process                                                                              |
| GO:0016070 | 0.93 | 1.30E-03 | 12 | Cellular RNA metabolic process                                                                |
| GO:0006974 | 2.07 | 1.40E-03 | 3  | Response to DNA damage stimulus                                                               |
| GO:0022403 | 2.48 | 1.50E-03 | 3  | Cell cycle phase                                                                              |
| GO:0031323 | 0.84 | 1.70E-03 | 14 | Regulation of cellular metabolic process                                                      |
| GO:0044237 | 0.37 | 1.90E-03 | 44 | Cellular metabolic process                                                                    |
| GO:0051171 | 0.85 | 2.80E-03 | 13 | Regulation of nitrogen compound metabolic process                                             |
| GO:0019219 | 0.84 | 3.80E-03 | 13 | Regulation of cellular nucleobase, nucleoside, nucleotide, and nucleic acid metabolic process |
| GO:0009887 | 2.03 | 4.20E-03 | 3  | Organ morphogenesis                                                                           |
| GO:0044238 | 0.34 | 4.30E-03 | 45 | Primary metabolic process                                                                     |
| GO:0019222 | 0.75 | 1.00E-02 | 15 | Regulation of metabolic process                                                               |
| GO:0031326 | 0.80 | 1.00E-02 | 13 | Regulation of cellular biosynthetic process                                                   |
| GO:0009889 | 0.80 | 1.00E-02 | 13 | Regulation of biosynthetic process                                                            |
| GO:0006350 | 0.79 | 1.00E-02 | 13 | Cellular transcription                                                                        |
| GO:0061018 | 0.79 | 1.00E-02 | 13 | Transcription                                                                                 |
| GO:0008152 | 0.28 | 1.00E-02 | 51 | Metabolic process                                                                             |
| GO:0010467 | 0.56 | 1.00E-02 | 21 | Gene expression                                                                               |
| GO:0080090 | 0.77 | 1.00E-02 | 13 | Regulation of primary metabolic process                                                       |
| GO:0048608 | 0.95 | 1.00E-02 | 9  | Reproductive structure development                                                            |
| GO:0007126 | 2.83 | 1.00E-02 | 2  | Meiosis                                                                                       |
| GO:0051327 | 2.83 | 1.00E-02 | 2  | M phase of meiotic cell cycle                                                                 |
| GO:0000279 | 2.43 | 2.00E-02 | 2  | M phase                                                                                       |
| GO:0045449 | 0.79 | 2.00E-02 | 12 | Regulation of cellular transcription                                                          |
| GO:0061019 | 0.79 | 2.00E-02 | 12 | Regulation of transcription                                                                   |
| GO:0010556 | 0.78 | 2.00E-02 | 12 | Regulation of macromolecule biosynthetic process                                              |

|            |      |          |    |                                               |
|------------|------|----------|----|-----------------------------------------------|
| GO:0048366 | 1.83 | 2.00E-02 | 3  | Leaf development                              |
| GO:0022414 | 0.85 | 2.00E-02 | 11 | Reproductive process                          |
| GO:0010468 | 0.74 | 2.00E-02 | 13 | Regulation of gene expression                 |
| GO:0060255 | 0.73 | 2.00E-02 | 14 | Regulation of macromolecule metabolic process |
| GO:0009451 | 2.20 | 3.00E-02 | 2  | RNA modification                              |
| GO:0032501 | 0.64 | 3.00E-02 | 16 | Multicellular organismal process              |
| GO:0000003 | 0.83 | 3.00E-02 | 11 | Reproduction                                  |
| GO:0007275 | 0.64 | 3.00E-02 | 16 | Multicellular organismal development          |
| GO:0007017 | 2.16 | 3.00E-02 | 2  | Microtubule-based process                     |
| GO:0042254 | 1.84 | 3.00E-02 | 3  | Ribosome biogenesis                           |
| GO:0009888 | 1.49 | 4.00E-02 | 4  | Tissue development                            |
| GO:0003006 | 0.86 | 5.00E-02 | 9  | Reproductive developmental process            |

**Down-regulated specifically in *spen3-1***

|            |      |          |    |                     |
|------------|------|----------|----|---------------------|
| GO:0023046 | 1.18 | 3.00E-02 | 10 | Signaling process   |
| GO:0023060 | 1.18 | 3.00E-02 | 10 | Signal transmission |
| GO:0007623 | 2.80 | 5.00E-02 | 3  | Circadian rhythm    |
| GO:0048511 | 2.80 | 5.00E-02 | 3  | Rhythmic process    |

**Up-regulated in *hub1-4* and *khd1-1***

|            |      |          |    |                                          |
|------------|------|----------|----|------------------------------------------|
| GO:0050896 | 1.15 | 1.09E-25 | 42 | Response to stimulus                     |
| GO:0009725 | 2.00 | 1.78E-24 | 20 | Response to hormone stimulus             |
| GO:0010033 | 1.67 | 7.16E-24 | 25 | Response to organic substance            |
| GO:0009719 | 1.91 | 8.64E-24 | 20 | Response to endogenous stimulus          |
| GO:0009733 | 2.76 | 2.17E-23 | 12 | Response to auxin stimulus               |
| GO:0042221 | 1.27 | 9.13E-18 | 28 | Response to chemical stimulus            |
| GO:0009741 | 3.53 | 2.69E-09 | 4  | Response to brassinosteroid stimulus     |
| GO:0023052 | 1.26 | 9.32E-08 | 15 | Signaling                                |
| GO:0032870 | 2.25 | 1.09E-07 | 6  | Cellular response to hormone stimulus    |
| GO:0007165 | 1.43 | 1.25E-07 | 12 | Signal transduction                      |
| GO:0009755 | 2.24 | 3.00E-07 | 6  | Hormone-mediated signaling pathway       |
| GO:0051704 | 1.32 | 4.12E-07 | 13 | Multi-organism process                   |
| GO:0009607 | 1.42 | 4.20E-07 | 11 | Response to biotic stimulus              |
| GO:0023046 | 1.38 | 4.87E-07 | 12 | Signaling process                        |
| GO:0023060 | 1.38 | 4.87E-07 | 12 | Signal transmission                      |
| GO:0051707 | 1.43 | 5.50E-07 | 11 | Response to other organism               |
| GO:0071495 | 2.10 | 1.00E-06 | 6  | Cellular response to endogenous stimulus |
| GO:0007242 | 1.61 | 1.34E-06 | 9  | Intracellular signaling cascade          |
| GO:0051716 | 1.43 | 1.97E-06 | 10 | Cellular response to stimulus            |
| GO:0006952 | 1.44 | 2.24E-06 | 10 | Defense response                         |
| GO:0065008 | 1.51 | 3.19E-06 | 9  | Regulation of biological quality         |
| GO:0009606 | 3.47 | 3.45E-06 | 3  | Tropism                                  |
| GO:0006468 | 1.39 | 5.67E-06 | 10 | Protein amino acid phosphorylation       |
| GO:0065007 | 0.72 | 8.30E-06 | 27 | Biological regulation                    |
| GO:0006796 | 1.25 | 1.70E-05 | 11 | Phosphate metabolic process              |
| GO:0006793 | 1.24 | 1.78E-05 | 11 | Phosphorus metabolic process             |
| GO:0071310 | 1.83 | 2.12E-05 | 6  | Cellular response to organic substance   |
| GO:0055085 | 1.59 | 4.24E-05 | 7  | Transmembrane transport                  |
| GO:0006464 | 1.00 | 4.57E-05 | 15 | Protein modification process             |
| GO:0043687 | 1.12 | 4.94E-05 | 13 | Post-translational protein modification  |
| GO:0016310 | 1.24 | 7.49E-05 | 10 | Phosphorylation                          |
| GO:0006950 | 0.80 | 1.07E-04 | 20 | Response to stress                       |
| GO:0009630 | 3.39 | 1.44E-04 | 2  | Gravitropism                             |
| GO:0070887 | 1.66 | 2.05E-04 | 6  | Cellular response to chemical stimulus   |
| GO:0008219 | 1.90 | 4.16E-04 | 5  | Cell death                               |
| GO:0016265 | 1.90 | 4.16E-04 | 5  | Death                                    |
| GO:0016049 | 1.83 | 4.56E-04 | 5  | Cell growth                              |
| GO:0009639 | 2.17 | 4.97E-04 | 4  | Response to red or far red light         |
| GO:0009629 | 3.18 | 5.31E-04 | 2  | Response to gravity                      |
| GO:0043412 | 0.89 | 6.22E-04 | 15 | Macromolecule modification               |
| GO:0012501 | 1.97 | 7.42E-04 | 4  | Programmed cell death                    |
| GO:0008361 | 1.76 | 9.31E-04 | 5  | Regulation of cell size                  |
| GO:0032535 | 1.74 | 1.20E-03 | 5  | Regulation of cellular component size    |
| GO:0090066 | 1.74 | 1.20E-03 | 5  | Regulation of anatomical structure size  |
| GO:0051179 | 0.90 | 1.40E-03 | 14 | Localization                             |
| GO:0040007 | 1.61 | 1.70E-03 | 5  | Growth                                   |
| GO:0048589 | 1.81 | 1.80E-03 | 5  | Developmental growth                     |
| GO:0006810 | 0.90 | 1.90E-03 | 14 | Transport                                |
| GO:0009638 | 4.44 | 1.90E-03 | 1  | Phototropism                             |
| GO:0051234 | 0.90 | 2.10E-03 | 14 | Establishment of localization            |

|            |      |          |    |                                                      |
|------------|------|----------|----|------------------------------------------------------|
| GO:0050789 | 0.63 | 2.40E-03 | 23 | Regulation of biological process                     |
| GO:0009605 | 1.49 | 2.60E-03 | 6  | Response to external stimulus                        |
| GO:0080086 | 5.03 | 3.20E-03 | 1  | Stamen filament development                          |
| GO:0009692 | 3.76 | 3.80E-03 | 1  | Ethylene metabolic process                           |
| GO:0009693 | 3.76 | 3.80E-03 | 1  | Ethylene biosynthetic process                        |
| GO:0043449 | 3.71 | 4.70E-03 | 1  | Cellular alkene metabolic process                    |
| GO:0043450 | 3.71 | 4.70E-03 | 1  | Alkene biosynthetic process                          |
| GO:0050832 | 1.99 | 1.00E-02 | 4  | Defense response to fungus                           |
| GO:0050794 | 0.64 | 1.00E-02 | 20 | Regulation of cellular process                       |
| GO:0042742 | 1.71 | 1.00E-02 | 4  | Defense response to bacterium                        |
| GO:0009742 | 3.16 | 1.00E-02 | 2  | Brassinosteroid mediated signaling pathway           |
| GO:0043401 | 3.16 | 1.00E-02 | 2  | Steroid hormone mediated signaling pathway           |
| GO:0048545 | 3.16 | 1.00E-02 | 2  | Response to steroid hormone stimulus                 |
| GO:0071367 | 3.16 | 1.00E-02 | 2  | Cellular response to brassinosteroid stimulus        |
| GO:0071383 | 3.16 | 1.00E-02 | 2  | Cellular response to steroid hormone stimulus        |
| GO:0044042 | 2.26 | 2.00E-02 | 3  | Glucan metabolic process                             |
| GO:0010359 | 4.44 | 2.00E-02 | 1  | Regulation of anion channel activity                 |
| GO:0022898 | 4.44 | 2.00E-02 | 1  | Regulation of transmembrane transporter activity     |
| GO:0032409 | 4.44 | 2.00E-02 | 1  | Regulation of transporter activity                   |
| GO:0032412 | 4.44 | 2.00E-02 | 1  | Regulation of ion transmembrane transporter activity |
| GO:0034762 | 4.44 | 2.00E-02 | 1  | Regulation of transmembrane transport                |
| GO:0034765 | 4.44 | 2.00E-02 | 1  | Regulation of ion transmembrane transport            |
| GO:0044070 | 4.44 | 2.00E-02 | 1  | Regulation of anion transport                        |
| GO:0009416 | 1.21 | 2.00E-02 | 7  | Response to light stimulus                           |
| GO:0000902 | 1.66 | 2.00E-02 | 4  | Cell morphogenesis                                   |
| GO:0009314 | 1.18 | 3.00E-02 | 7  | Response to radiation                                |
| GO:0005976 | 1.55 | 3.00E-02 | 4  | Polysaccharide metabolic process                     |
| GO:0010200 | 1.72 | 4.00E-02 | 4  | Response to chitin                                   |

#### Up-regulated in *hub1-4* and *spen3-1*

|            |      |          |    |                                                |
|------------|------|----------|----|------------------------------------------------|
| GO:0050896 | 1.39 | 2.17E-08 | 50 | Response to stimulus                           |
| GO:0042221 | 1.49 | 4.43E-05 | 33 | Response to chemical stimulus                  |
| GO:0006952 | 2.27 | 6.45E-05 | 18 | Defense response                               |
| GO:0010033 | 1.64 | 8.04E-04 | 24 | Response to organic substance                  |
| GO:0051704 | 1.90 | 8.14E-04 | 19 | Multi-organism process                         |
| GO:0051707 | 2.03 | 1.20E-03 | 17 | Response to other organism                     |
| GO:0009607 | 2.00 | 1.60E-03 | 17 | Response to biotic stimulus                    |
| GO:0065008 | 2.18 | 2.00E-03 | 15 | Regulation of biological quality               |
| GO:0012501 | 3.05 | 2.30E-03 | 9  | Programmed cell death                          |
| GO:0006950 | 1.31 | 3.70E-03 | 28 | Response to stress                             |
| GO:0009626 | 4.13 | 4.50E-03 | 6  | Plant-type hypersensitive response             |
| GO:0042592 | 2.92 | 4.60E-03 | 9  | Homeostatic process                            |
| GO:0034050 | 4.11 | 4.70E-03 | 6  | Host programmed cell death induced by symbiont |
| GO:0009719 | 1.76 | 1.00E-02 | 18 | Response to endogenous stimulus                |
| GO:0008219 | 2.83 | 1.00E-02 | 9  | Cell death                                     |
| GO:0016265 | 2.83 | 1.00E-02 | 9  | Death                                          |
| GO:0009987 | 0.52 | 4.00E-02 | 65 | Cellular process                               |

#### Up-regulated specifically in *hub1-4*

|            |      |          |    |                                                         |
|------------|------|----------|----|---------------------------------------------------------|
| GO:0050896 | 0.82 | 3.06E-11 | 34 | Response to stimulus                                    |
| GO:0006950 | 0.69 | 2.10E-03 | 19 | Response to stress                                      |
| GO:0065007 | 0.56 | 3.30E-03 | 25 | Biological regulation                                   |
| GO:0007623 | 2.53 | 1.00E-02 | 2  | Circadian rhythm                                        |
| GO:0048511 | 2.53 | 1.00E-02 | 2  | Rhythmic process                                        |
| GO:0009987 | 0.27 | 1.00E-02 | 55 | Cellular process                                        |
| GO:0023052 | 0.86 | 1.00E-02 | 11 | Signaling                                               |
| GO:0016310 | 1.00 | 1.00E-02 | 9  | Phosphorylation                                         |
| GO:0000160 | 2.43 | 2.00E-02 | 2  | Two-component signal transduction system (phosphorelay) |
| GO:0006796 | 0.94 | 2.00E-02 | 9  | Phosphate metabolic process                             |
| GO:0006793 | 0.94 | 2.00E-02 | 9  | Phosphorus metabolic process                            |
| GO:0006468 | 1.03 | 2.00E-02 | 8  | Protein amino acid phosphorylation                      |
| GO:0044237 | 0.32 | 3.00E-02 | 42 | Cellular metabolic process                              |

#### Up-regulated specifically in *khd1-1*

|            |      |          |    |                               |
|------------|------|----------|----|-------------------------------|
| GO:0050896 | 1.1  | 3.53E-19 | 41 | Response to stimulus          |
| GO:0042221 | 1.23 | 1.19E-13 | 28 | Response to chemical stimulus |
| GO:0006950 | 1.19 | 4.49E-12 | 26 | Response to stress            |
| GO:0010033 | 1.21 | 1.28E-07 | 18 | Response to organic substance |
| GO:0006979 | 2.11 | 4.37E-06 | 6  | Response to oxidative stress  |
| GO:0006952 | 1.41 | 7.54E-05 | 10 | Defense response              |

|            |      |          |    |                                         |
|------------|------|----------|----|-----------------------------------------|
| GO:0065007 | 0.71 | 1.15E-04 | 27 | Biological regulation                   |
| GO:0009741 | 3.17 | 1.55E-04 | 3  | Response to brassinosteroid stimulus    |
| GO:0040007 | 1.77 | 4.93E-04 | 6  | Growth                                  |
| GO:0009607 | 1.27 | 5.13E-04 | 10 | Response to biotic stimulus             |
| GO:0009628 | 0.97 | 6.55E-04 | 15 | Response to abiotic stimulus            |
| GO:0051707 | 1.27 | 7.53E-04 | 10 | Response to other organism              |
| GO:0051704 | 1.14 | 1.10E-03 | 11 | Multi-organism process                  |
| GO:0009651 | 1.45 | 1.20E-03 | 8  | Response to salt stress                 |
| GO:0006970 | 1.41 | 1.30E-03 | 8  | Response to osmotic stress              |
| GO:0065008 | 1.36 | 1.70E-03 | 8  | Regulation of biological quality        |
| GO:0009719 | 1.09 | 2.80E-03 | 11 | Response to endogenous stimulus         |
| GO:0016049 | 1.83 | 3.00E-03 | 5  | Cell growth                             |
| GO:0050832 | 2.11 | 4.30E-03 | 4  | Defense response to fungus              |
| GO:0009725 | 1.11 | 4.30E-03 | 11 | Response to hormone stimulus            |
| GO:0008361 | 1.77 | 1.00E-02 | 5  | Regulation of cell size                 |
| GO:0006869 | 2.41 | 1.00E-02 | 3  | Lipid transport                         |
| GO:0032535 | 1.75 | 1.00E-02 | 5  | Regulation of cellular component size   |
| GO:0090066 | 1.75 | 1.00E-02 | 5  | Regulation of anatomical structure size |
| GO:0019748 | 1.52 | 1.00E-02 | 6  | Secondary metabolic process             |
| GO:0050789 | 0.63 | 1.00E-02 | 23 | Regulation of biological process        |
| GO:0023052 | 0.96 | 1.00E-02 | 12 | Signaling                               |
| GO:0010876 | 2.25 | 2.00E-02 | 3  | Lipid localization                      |
| GO:0032502 | 0.72 | 2.00E-02 | 18 | Developmental process                   |
| GO:0050794 | 0.65 | 2.00E-02 | 21 | Regulation of cellular process          |
| GO:0055114 | 1.09 | 3.00E-02 | 9  | Oxidation reduction                     |
| GO:0006810 | 0.85 | 3.00E-02 | 13 | Transport                               |
| GO:0051234 | 0.84 | 4.00E-02 | 13 | Establishment of localization           |

**Up-regulated specifically in *spen3-1***

|            |      |          |    |                                     |
|------------|------|----------|----|-------------------------------------|
| GO:0050896 | 0.79 | 3.05E-05 | 33 | Response to stimulus                |
| GO:0042221 | 1.01 | 3.68E-05 | 24 | Response to chemical stimulus       |
| GO:0009607 | 1.42 | 8.29E-04 | 11 | Response to biotic stimulus         |
| GO:0051707 | 1.40 | 0.0015   | 11 | Response to other organism          |
| GO:0008152 | 0.40 | 0.0037   | 56 | Metabolic process                   |
| GO:0009628 | 1.01 | 0.01     | 16 | Response to abiotic stimulus        |
| GO:0051704 | 1.19 | 0.01     | 12 | Multi-organism process              |
| GO:0055114 | 1.29 | 0.01     | 10 | Oxidation reduction                 |
| GO:0042542 | 3.43 | 0.01     | 2  | Response to hydrogen peroxide       |
| GO:0015893 | 3.05 | 0.02     | 3  | Drug transport                      |
| GO:0042493 | 3.04 | 0.02     | 3  | Response to drug                    |
| GO:0006979 | 1.89 | 0.02     | 6  | Response to oxidative stress        |
| GO:0000302 | 2.96 | 0.02     | 3  | Response to reactive oxygen species |
| GO:0010035 | 1.43 | 0.03     | 8  | Response to inorganic substance     |

---

**Table S3. Primer sequences**

| Gene                           | AGI code  | Primer set | Forward Primer Sequence          | Reverse Primer Sequence         |
|--------------------------------|-----------|------------|----------------------------------|---------------------------------|
| <b>Real-time qPCR</b>          |           |            |                                  |                                 |
| <i>SPEN3</i>                   | At1g27750 |            | CCCTGCATCAAGTCCCATGT             | ACCGATCAAGCATTCGAGG             |
| <i>KHD1</i>                    | At1g51580 |            | CCCCATTTGGACCGAGACAA             | CCAGGACCATGACAATGCCT            |
| <i>CCA1</i>                    | At2g46830 |            | CCATGGAAGCCAAAGAAAGT             | GGAAAGCTTGAGTTTCCAACC           |
| <i>PP2A</i>                    | At1g13320 |            | TAACGTGGCCAAAATGATGC             | GTTCTCCACAACCGCTTGGT            |
| <i>UBC</i>                     | At5g25760 |            | CTGCGACTCAGGGAATCTTCTAA          | TTGTGCCATTGAATTGAACCC           |
| <i>FLC</i>                     | At5g10140 |            | CCTCTCCGTGACTAGAGCCAAG           | AGGTGACATCTCCATCTCAGCTTC        |
| <i>FLC2</i>                    |           |            | TTTGTCCAGCAGGTGACATC             | AGCCAAGAAGACCGAACTCA            |
| <i>totalCOOLAIR</i>            |           |            | GCCGTAGGCTTCTTCACTGT             | TGTATGTGTTCTTCACTTCTGTCAA       |
| <i>proxCOOLAIR</i>             |           |            | CACACCACCAAATAACAACCA            | TTTTTTTTTTTTTTTACTGCTTCCA       |
| <i>distCOOLAIR</i>             |           |            | GGGGTAAACGAGAGTGATGC             | TTTTTTTTTTTTTTTTCGGGTACAC       |
| <i>CCA1<math>\alpha</math></i> |           |            | GATCTGGTTATTAAGACTCGGAAGCCATATAC | GCCTCTTCTCTACCTTGGAGA           |
| <i>CCA1<math>\beta</math></i>  |           |            | GAATGTTCCCTTGTGATAAGCCATAGAGG    | AGGATCGTTCCTTCCCGTCTT           |
|                                | At1g77920 |            | CGAGTCCACGCATTATCCCA             | CCTCGACCGATTGTCTTGT             |
|                                | At1g77930 |            | TCGAGCTTGATACCGAAGCAG            | AGAGACAGAGAGGGAGCAAGT           |
| <b>ChIP-qPCR</b>               |           |            |                                  |                                 |
| <i>CCA1</i>                    | At2g46830 | P1         | GAACAAGTTGATGTTAAGATGGAC         | GGAGAAATCTCAGCCACTATAATTATC     |
|                                |           | P2         | GAAGTTGTGTAGAGGAGCTTAGTG         | CTTCCTCAGTCCACCTTTCACGTTGC      |
|                                |           | P3         | ATCCTCGAAAGACGGGAAGT             | GTCGATCTTCATTGGCCATC            |
|                                |           | P4         | AAGGCTCGATCTTCACTGGA             | CCATCCTCTTGCCTTCTGA             |
|                                |           | P5         | CTCAAGCTTCCACATGAGACTC           | GTTACAGGAAGACTATGGACAAG         |
| <i>FLC</i>                     | At5g10140 | P1         | GTTCCGGGAGATTAACACAAATAATAAAGG   | GAAAACAAGCTGATACAAGCATTTTCC     |
|                                |           | P2         | GCTGGACCTAACTAGGGGTGAAC          | CCTCTTTGGTACGGATCTATAATGAATC    |
|                                |           | P3         | CCTCTCCGTGACTAGAGCCAAG           | CTTCAACATGAGTTCCGGTCTGC         |
|                                |           | P4         | CCTTGGATAGAAGACAAAAGAGAAAGTG     | AGGTGACATCTCCATCTCAGCTTC        |
| <b>Cloning</b>                 |           |            |                                  |                                 |
| <i>KHD1N</i>                   |           |            | ACAGGATCCAAACGTCCGGCGACGACA      | ACAGTCGACTCAACTCGTCCCATGTTGGA   |
| <i>RRMSPEN3</i>                |           |            | CACGGATCCACTCTACGGATCGTAGGAA     | CACGTGACTCAAATCCTTTCACTGGATCAAA |
| <b>EMSA</b>                    |           |            |                                  |                                 |
| <i>RNA</i>                     |           |            | AAAACAAAAUAGCACCGUAAAGCAC        |                                 |
| <i>DNA</i>                     |           |            | AAAACAAAATACCAGCGTAAAGCAC        |                                 |

**Supplemental dataset S1 (separate file)**

Protein Identification details obtained with the 4800 MALDI TOF/TOFTM Proteomics analyzer (AB SCIEX) and the GPS explorer v3.6 (AB SCIEX) software package combined with the search engine Mascot version 2.1 (Matrix Science) and database TAIR8.



## Supporting references

1. Alonso JM, et al. (2003) Genome-wide insertional mutagenesis of *Arabidopsis thaliana*. *Science* 301(5633), 653-657 [Err. *Science* 301(5641), 1849].
2. Rosso MG, et al. (2003) An *Arabidopsis thaliana* T-DNA mutagenized population (GABI-Kat) for flanking sequence tag-based reverse genetics. *Plant Mol Biol* 53(1-2), 247-259.
3. Sessions A, et al. (2002) A high-throughput *Arabidopsis* reverse genetics system. *Plant Cell* 14(12), 2985-2994.
4. Fleury D, et al. (2007) The *Arabidopsis thaliana* homolog of yeast *BRE1* has a function in cell cycle regulation during early leaf and root growth. *Plant Cell* 19(2), 417-432.
5. Salomé PA, McClung R (2005) *PSEUDO-RESPONSE REGULATOR7* and *9* are partially redundant genes essential for the temperature responsiveness of the *Arabidopsis* circadian clock. *Plant Cell* 17(3), 791-803.
6. Portolés S, Más P (2007) Altered oscillator function affects clock resonance and is responsible for the reduced day-length sensitivity of *CKB4* overexpressing plants. *Plant J* 51(6), 966-977.
7. Dhondt S, et al. (2014) High-resolution time-resolved imaging of *in vitro* *Arabidopsis* rosette growth. *Plant J* 80(1), 172-184.
8. Skirycz A, et al. (2011) Survival and growth of *Arabidopsis* plants given limited water are not equal. *Nat. Biotechnol* 29(3), 212-214.
9. Clauw P, et al. (2015) Leaf responses to mild drought stress in natural variants of *Arabidopsis*. *Plant Physiol* 167(3), 800-816. [Corrigendum *Plant Physiol*. 168(3), 1180].
10. Coppens F, Wuyts N, Inzé D, Dhondt S (2017) Unlocking the potential of plant phenotyping data through integration and data-driven approaches. *Curr Opin Syst Biol* 4, 58-63.
11. Moore A, Zielinski T, Millar AJ (2014) Online period estimation and determination of rhythmicity in circadian data, using the BioDare data infrastructure. *Methods Mol Biol* 1158, 13-44.
12. Van Bel M, et al. (2012) Dissecting plant genomes with the PLAZA comparative genomics platform. *Plant Physiol* 158(2), 590-600.
13. Bruno L, et al. (2011) Multi-probe *in situ* hybridization to whole mount *Arabidopsis* seedlings. *Int J Dev Biol* 55 (2), 197-203.
14. Casamitjana-Martínez E, et al. (2003) Root-specific *CLE19* overexpression and the *sol1/2* suppressors implicate a CLV-like pathway in the control of *Arabidopsis* root meristem maintenance. *Curr Biol* 13(16), 1435-1441.
15. Rigaut G, et al. (1999) A generic protein purification method for protein complex characterization and proteome exploration. *Nat Biotechnol* 17(10), 1030-1032.
16. Bürckstümmer T, et al. (2006) An efficient tandem affinity purification procedure for interaction proteomics in mammalian cells. *Nat Methods* 3(12), 1013-1019.
17. Van Leene J, et al. (2007) A tandem affinity purification-based technology platform to study the cell cycle interactome in *Arabidopsis thaliana*. *Mol Cell Proteomics* 6(7), 1226-1238.
18. Van Leene J, et al. (2010) Targeted interactomics reveals a complex core cell cycle machinery in *Arabidopsis thaliana*. *Mol Syst Biol* 6(1), 397.
19. Krohn NM, Yanagisawa S, Grasser KD (2002) Specificity of the stimulatory interaction between chromosomal HMGB proteins and the transcription factor Dof2 and its negative regulation by protein kinase CK2-mediated phosphorylation. *J Biol Chem* 277(36), 32438-32444.
20. Kammel C, et al. (2013) *Arabidopsis* DEAD-box RNA helicase UAP56 interacts with both RNA and DNA as well as with mRNA export factors. *PLoS ONE* 8(3), e60644.

21. Shen J, Zhang L, Zhao R (2007) Biochemical characterization of the ATPase and helicase activity of UAP56, an essential pre-mRNA splicing and mRNA export factor. *J Biol Chem* 282(31), 22544-22550.
22. Cao Y, Dai Y, Cui S, Ma L (2008) Histone H2B monoubiquitination in the chromatin of *FLOWERING LOCUS C* regulates flowering time in *Arabidopsis*. *Plant Cell* 20(10), 2586-2602.
23. Guindon S, et al. (2010) New algorithms and methods to estimate maximum-likelihood phylogenies: assessing the performance of PhyML 3.0. *Syst Biol* 59(3), 307–321.
24. Guindon S, Gascuel O (2003) A simple, fast, and accurate algorithm to estimate large phylogenies by maximum likelihood. *Syst Biol* 52(5), 696-704.
25. Ronquist F, et al. (2012) MrBayes 3.2: efficient Bayesian phylogenetic inference and model choice across a large model space. *Syst Biol* 61(3), 539-542.
26. Kumar S, Stecher G, Li M, Knyaz C, Tamura K (2018) MEGA X: Molecular Evolutionary Genetics Analysis across Computing Platforms. *Mol Biol Evol* 35(6), 1547-1549.
